# Supplementary material for: Signatures of COVID-19 Severity and Immune Response in the Respiratory Tract Microbiome
Source: PubMed Central journal article supplement (PMC8406335; doi:10.1128/mbio.01777-21), 2021-08-17

**Figure S1****A**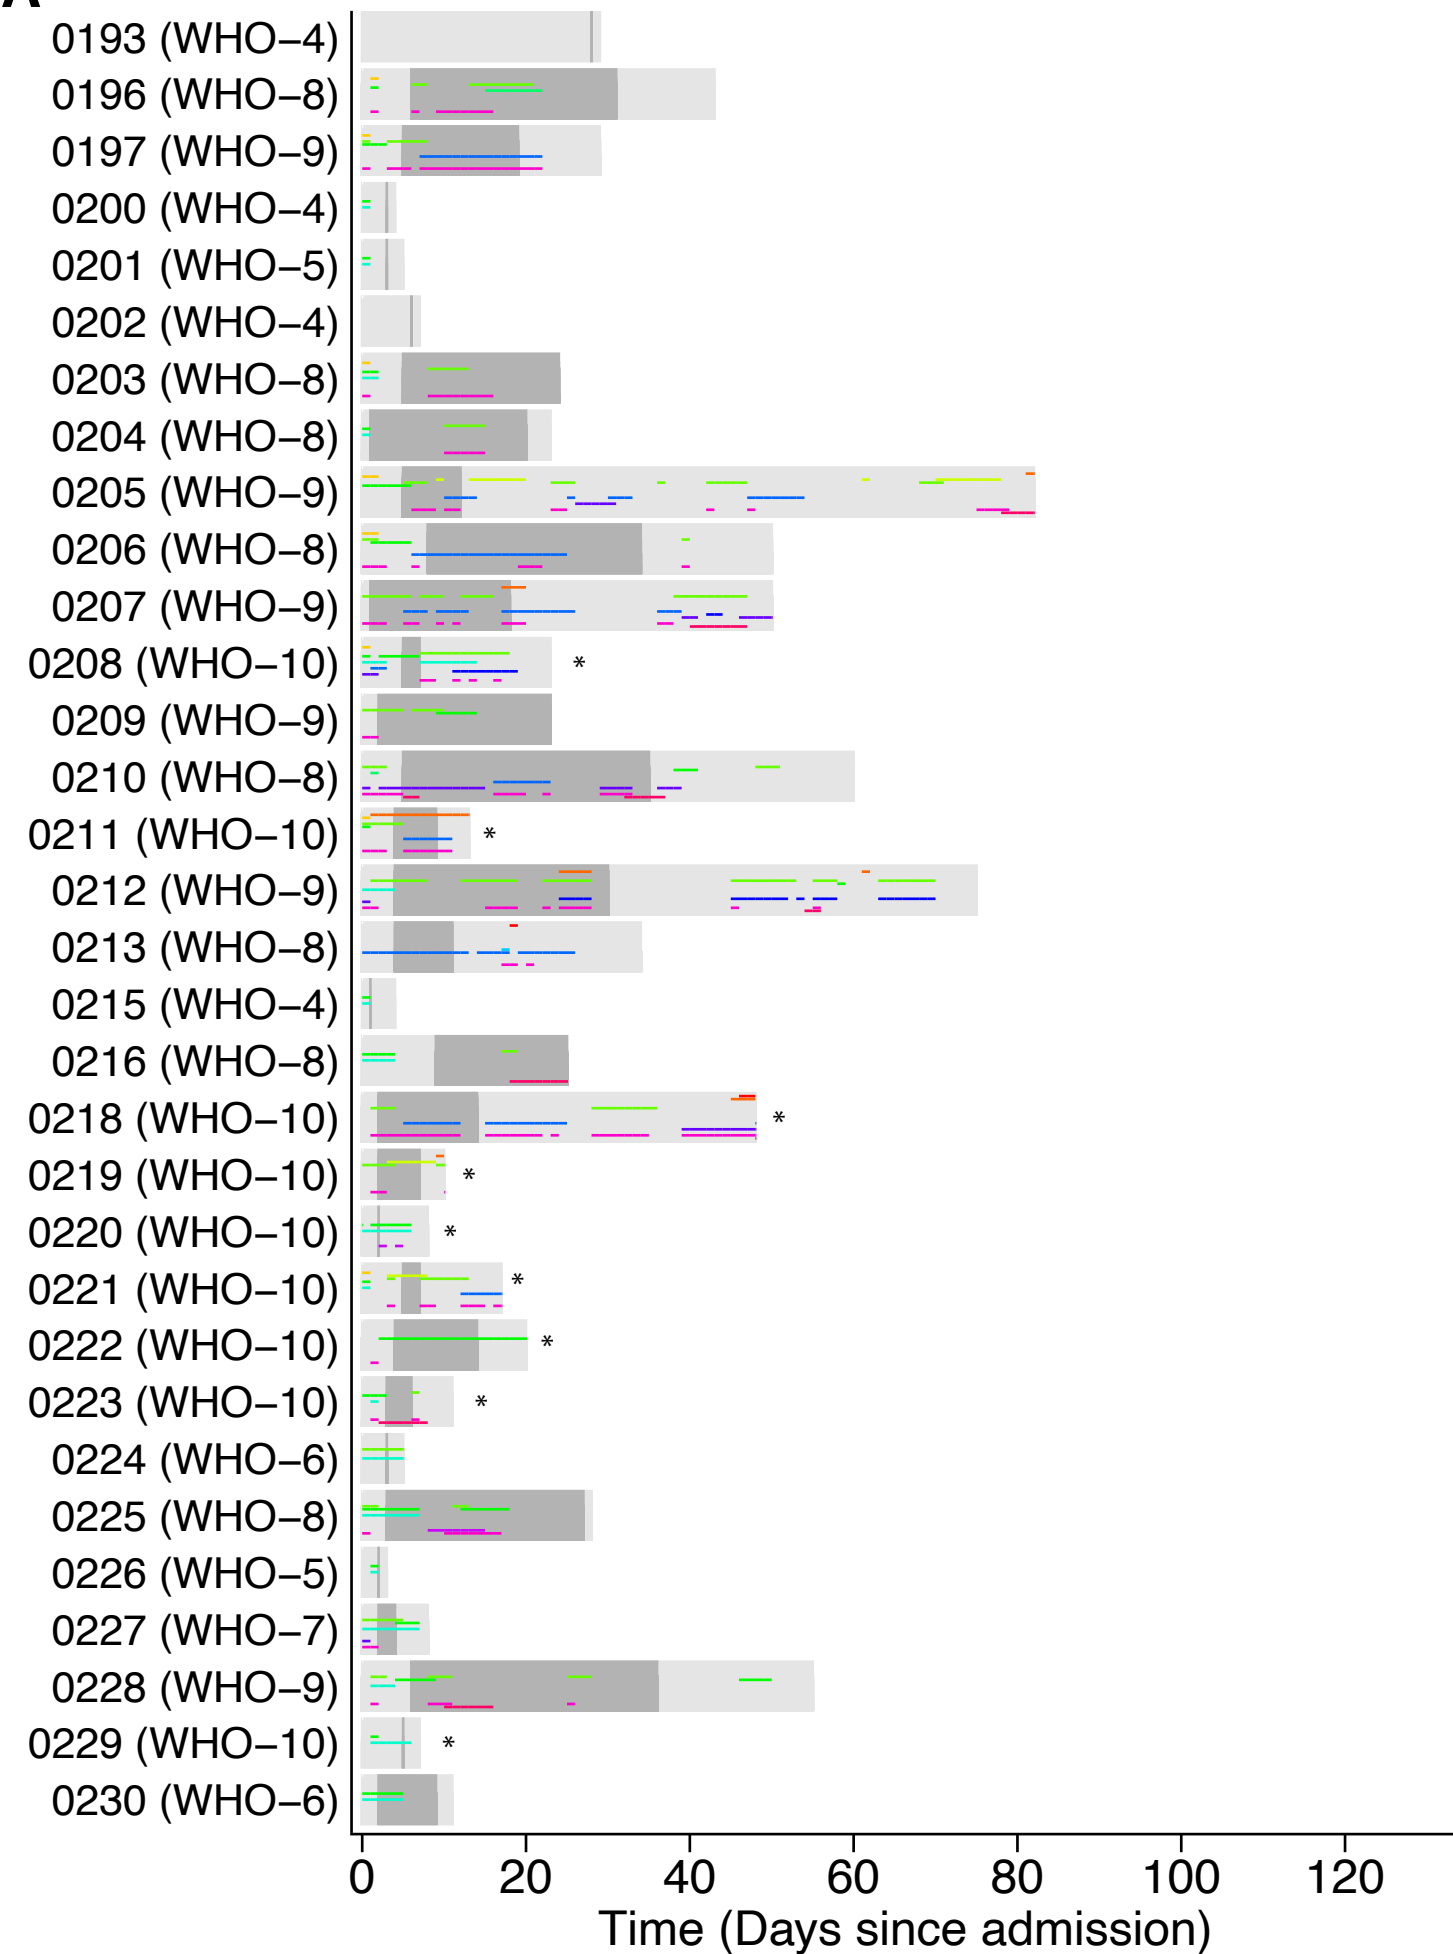**B**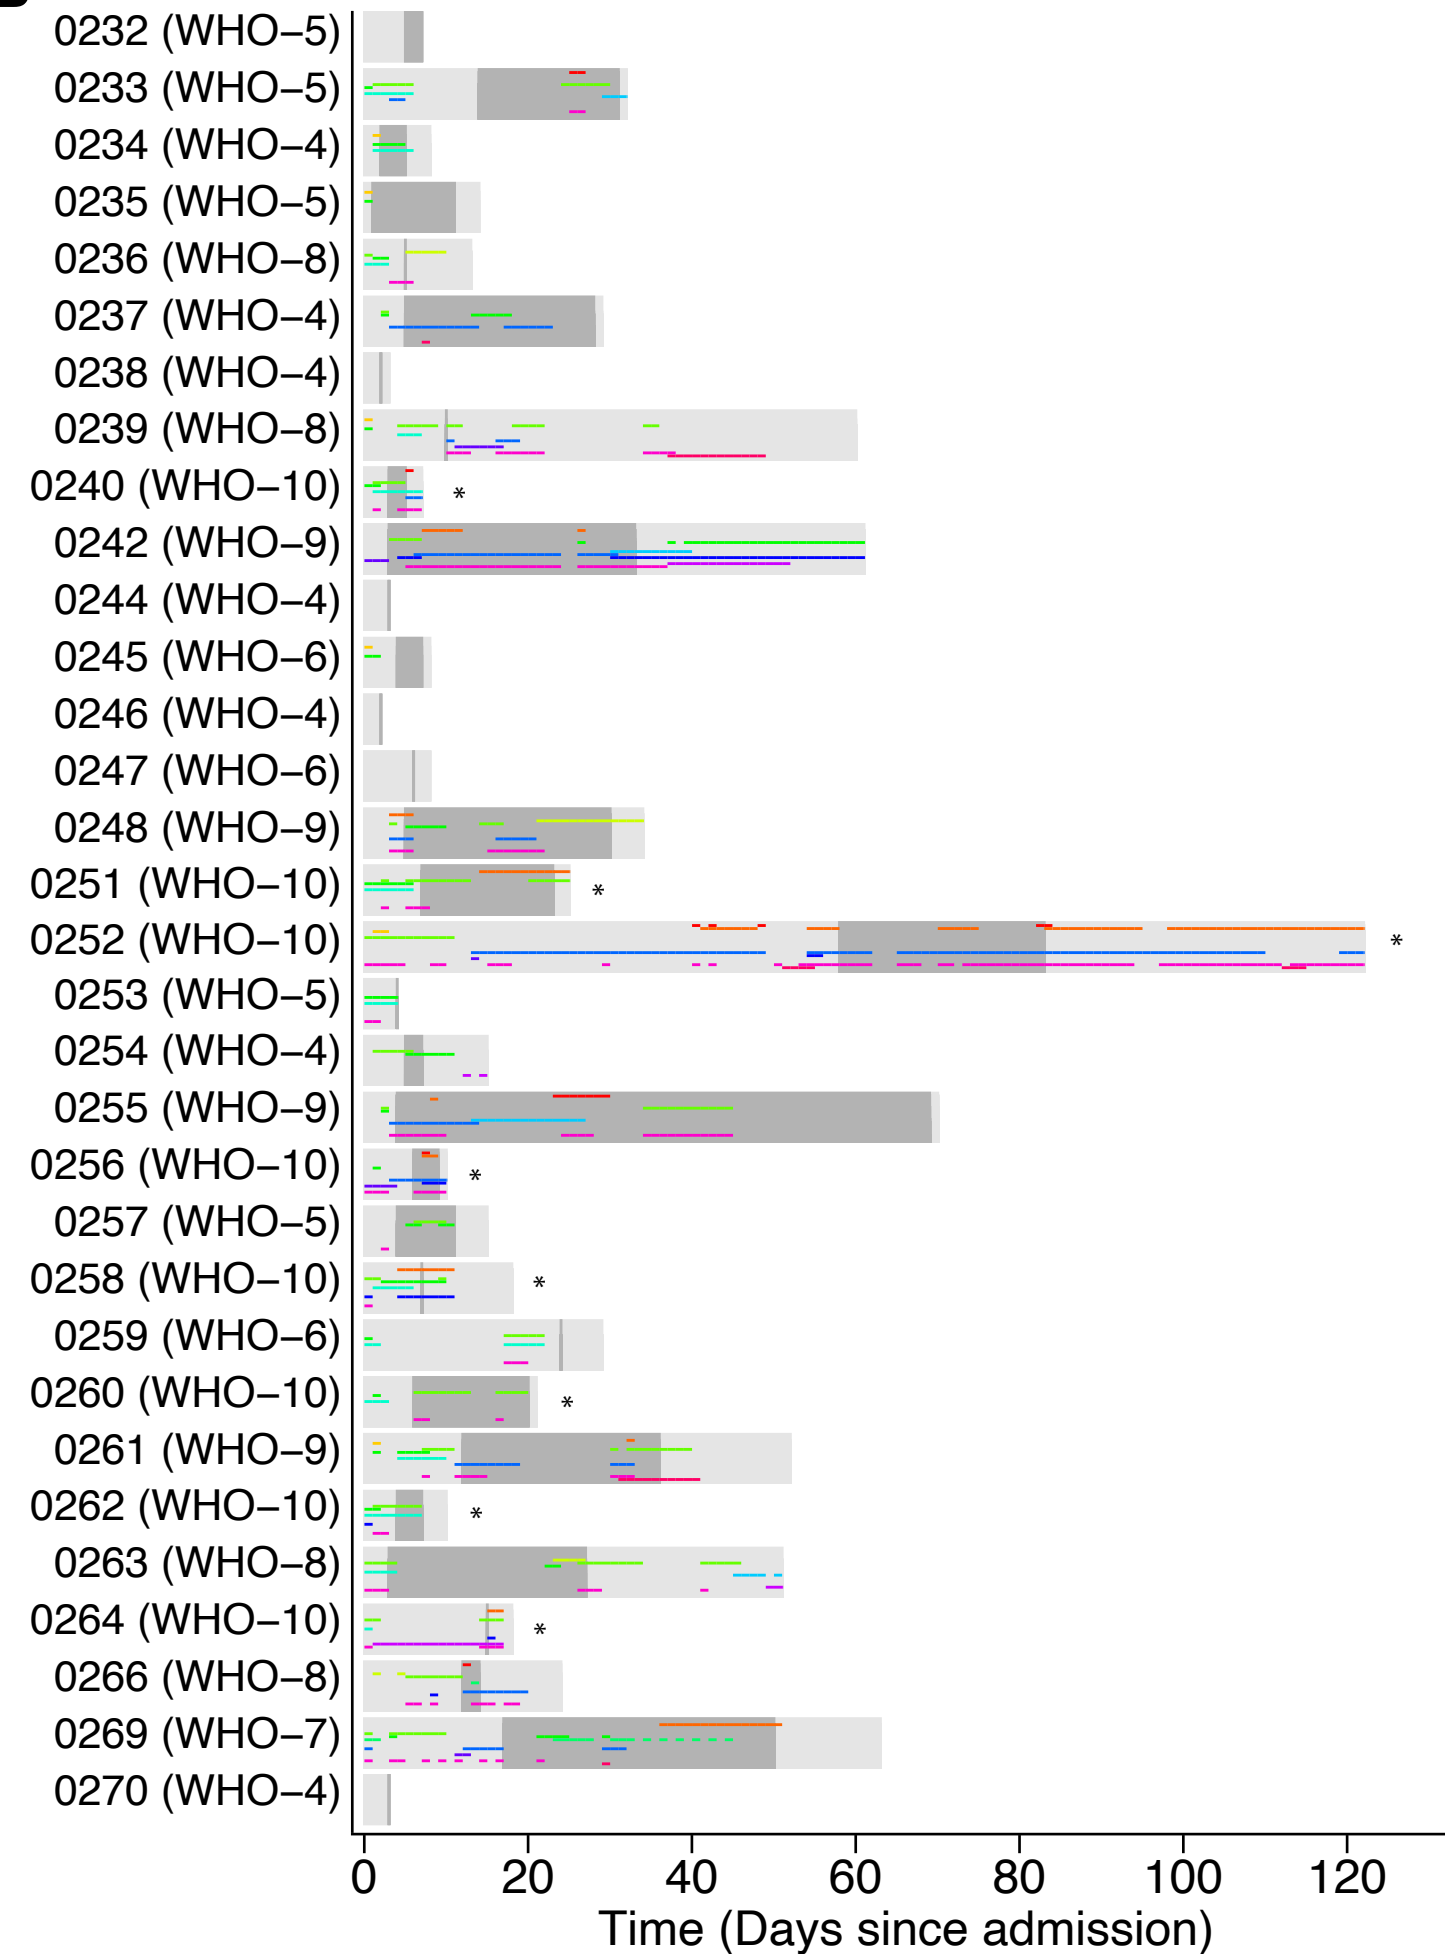**C**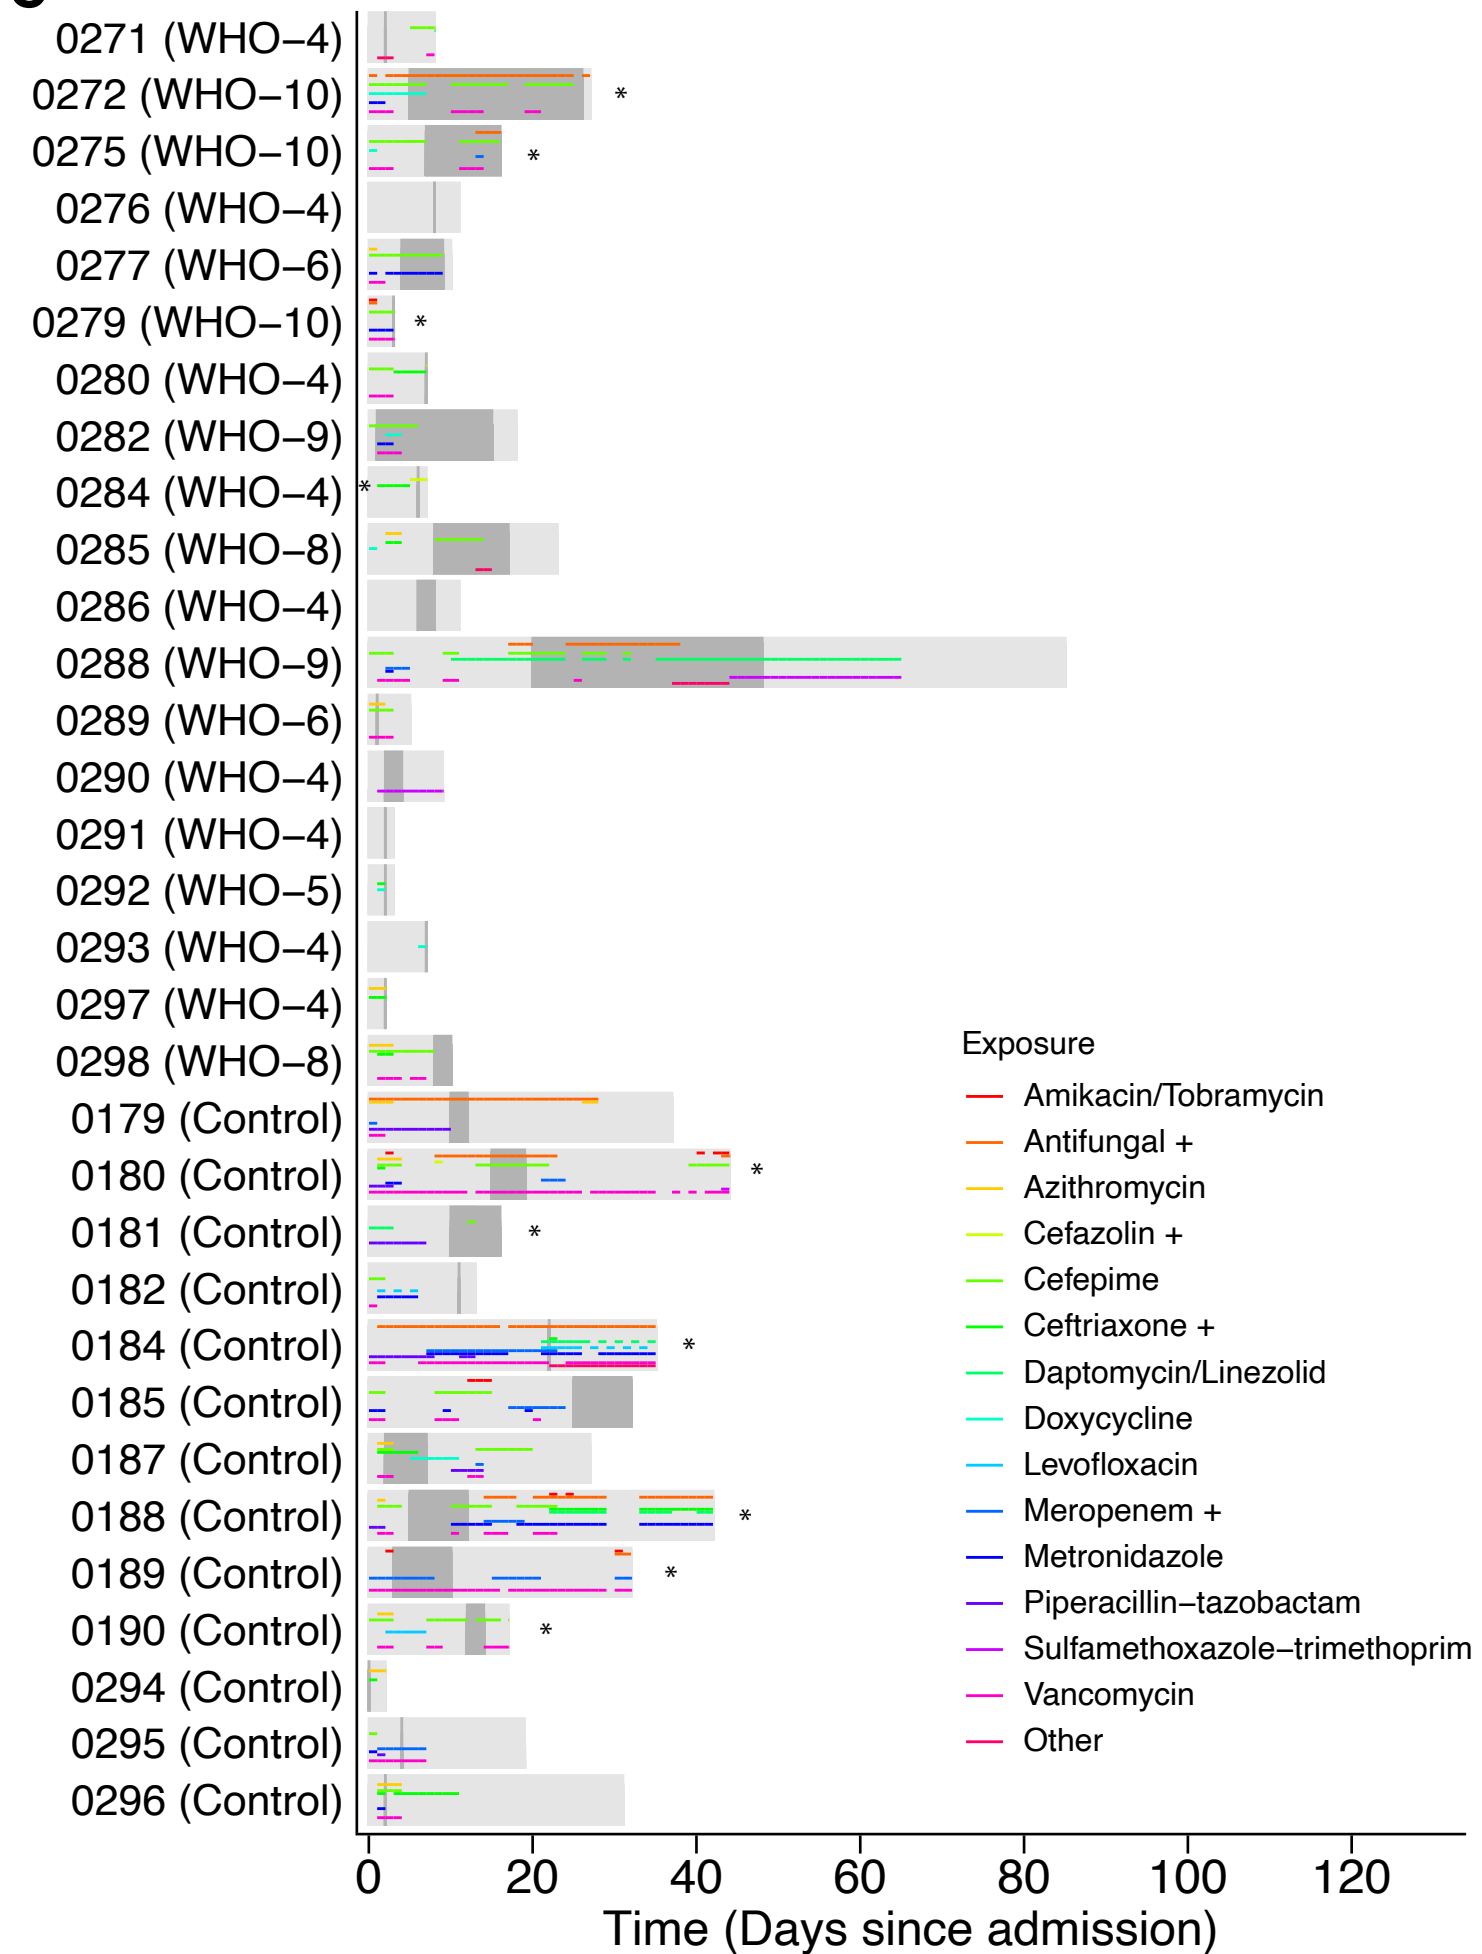

Supplement: mbio.01777-21-sf001.pdf [file mbio.01777-21-sf001.pdf]
