# Supplementary material for: Signatures of COVID-19 Severity and Immune Response in the Respiratory Tract Microbiome
Source: PubMed Central journal article supplement (PMC8406335; doi:10.1128/mbio.01777-21), 2021-08-17
Supplement: mbio.01777-21-st002.pdf [file mbio.01777-21-st002.pdf]

**Table S2. Samples analyzed by 16S rRNA marker gene sequencing.**

| SampleID                     | sample_type           | dna_kit | SubjectID | study_day | study_group | host_species | sample_idms | dtc_added | dna_conc_ng_ul | library_conc_ng_ul | vol_for_epMotion |
|------------------------------|-----------------------|---------|-----------|-----------|-------------|--------------|-------------|-----------|----------------|--------------------|------------------|
| CORE0181.V1.nonCOVID.NP.P5   | Nasopharyngeal swab   | PS      | CORE0181  | V1        | non COVID   | Human        | None        | No        | None           | 35.08              | 2.9              |
| CORE0181.V1.nonCOVID.OP.P5   | Oropharyngeal swab    | PS      | CORE0181  | V1        | non COVID   | Human        | None        | No        | None           | 21.93              | 4.6              |
| CORE0181.V2.nonCOVID.ETA.PRO | Endotracheal aspirate | PRO     | CORE0181  | V2        | non COVID   | Human        | None        | No        | None           | 64.91              | 1.5              |
| CORE0181.V2.nonCOVID.NP.P5   | Nasopharyngeal swab   | PS      | CORE0181  | V2        | non COVID   | Human        | None        | No        | None           | 20.01              | 5                |
| CORE0181.V2.nonCOVID.OP.P5   | Oropharyngeal swab    | PS      | CORE0181  | V2        | non COVID   | Human        | None        | No        | None           | 13.4               | 7.5              |
| CORE0181.V3.nonCOVID.ETA.PRO | Endotracheal aspirate | PRO     | CORE0181  | V3        | non COVID   | Human        | None        | No        | None           | 53.54              | 1.9              |
| CORE0181.V3.nonCOVID.NP.P5   | Nasopharyngeal swab   | PS      | CORE0181  | V3        | non COVID   | Human        | None        | No        | None           | 18.49              | 5.4              |
| CORE0181.V3.nonCOVID.OP.P5   | Oropharyngeal swab    | PS      | CORE0181  | V3        | non COVID   | Human        | None        | No        | None           | 17.42              | 5.7              |
| CORE0181.V4.nonCOVID.NP.P5   | Nasopharyngeal swab   | PS      | CORE0181  | V4        | non COVID   | Human        | None        | No        | None           | 16.54              | 6.1              |
| CORE0181.V4.nonCOVID.OP.P5   | Oropharyngeal swab    | PS      | CORE0181  | V4        | non COVID   | Human        | None        | No        | None           | 61.99              | 1.6              |
| CORE0189.V1.nonCOVID.NP.P5   | Nasopharyngeal swab   | PS      | CORE0189  | V1        | non COVID   | Human        | None        | No        | None           | 73.98              | 1.5              |
| CORE0189.V1.nonCOVID.OP.P5   | Oropharyngeal swab    | PS      | CORE0189  | V1        | non COVID   | Human        | None        | No        | None           | 69.18              | 1.5              |
| CORE0189.V2.nonCOVID.NP.P5   | Nasopharyngeal swab   | PS      | CORE0189  | V2        | non COVID   | Human        | None        | No        | None           | 28.03              | 3.6              |
| CORE0189.V2.nonCOVID.OP.P5   | Oropharyngeal swab    | PS      | CORE0189  | V2        | non COVID   | Human        | None        | No        | None           | 30.68              | 3.3              |
| CORE0189.V3.nonCOVID.ETA.PRO | Endotracheal aspirate | PRO     | CORE0189  | V3        | non COVID   | Human        | None        | No        | None           | 7.8                | 12.8             |
| CORE0189.V3.nonCOVID.NP.P5   | Nasopharyngeal swab   | PS      | CORE0189  | V3        | non COVID   | Human        | None        | No        | None           | 30.65              | 3.3              |
| CORE0189.V3.nonCOVID.OP.P5   | Oropharyngeal swab    | PS      | CORE0189  | V3        | non COVID   | Human        | None        | No        | None           | 9.36               | 10.7             |
| CORE0189.V4.nonCOVID.ETA.PRO | Endotracheal aspirate | PRO     | CORE0189  | V4        | non COVID   | Human        | None        | No        | None           | 10.67              | 9.4              |
| CORE0189.V4.nonCOVID.NP.P5   | Nasopharyngeal swab   | PS      | CORE0189  | V4        | non COVID   | Human        | None        | No        | None           | 36.07              | 2.8              |
| CORE0189.V4.nonCOVID.OP.P5   | Oropharyngeal swab    | PS      | CORE0189  | V4        | non COVID   | Human        | None        | No        | None           | 62.18              | 1.6              |
| CORE0206.V1.COVID.ETA.PRO    | Endotracheal aspirate | PRO     | CORE0206  | V1        | COVID       | Human        | None        | No        | None           | 8.53               | 11.7             |
| CORE0206.V1.COVID.NP.PRO     | Nasopharyngeal swab   | PRO     | CORE0206  | V1        | COVID       | Human        | None        | No        | 141.97         | 22.71              | 4.4              |
| CORE0206.V1.COVID.OP.PRO     | Oropharyngeal swab    | PRO     | CORE0206  | V1        | COVID       | Human        | None        | No        | 153.54         | 21.13              | 4.7              |
| CORE0206.V2.COVID.NP.PRO     | Nasopharyngeal swab   | PRO     | CORE0206  | V2        | COVID       | Human        | None        | No        | 98.82          | 28.3               | 3.5              |
| CORE0206.V2.COVID.OP.PRO     | Oropharyngeal swab    | PRO     | CORE0206  | V2        | COVID       | Human        | None        | No        | 149.49         | 16.23              | 6.2              |
| CORE0206.V3.COVID.ETA.PRO    | Endotracheal aspirate | PRO     | CORE0206  | V3        | COVID       | Human        | None        | No        | None           | 12.57              | 8                |
| CORE0206.V3.COVID.NP.PRO     | Nasopharyngeal swab   | PRO     | CORE0206  | V3        | COVID       | Human        | None        | No        | 14.67          | 47                 | 2.1              |
| CORE0206.V3.COVID.OP.PRO     | Oropharyngeal swab    | PRO     | CORE0206  | V3        | COVID       | Human        | None        | No        | 6.75           | 59.29              | 1.7              |
| CORE0207.V1.COVID.NP.PRO     | Nasopharyngeal swab   | PRO     | CORE0207  | V1        | COVID       | Human        | None        | No        | 10.1           | 37.71              | 2.7              |
| CORE0207.V1.COVID.OP.PRO     | Oropharyngeal swab    | PRO     | CORE0207  | V1        | COVID       | Human        | None        | No        | 2.34           | 84.93              | 1.5              |
| CORE0207.V2.COVID.NP.PRO     | Nasopharyngeal swab   | PRO     | CORE0207  | V2        | COVID       | Human        | None        | No        | 139.93         | 30.37              | 3.3              |
| CORE0207.V2.COVID.OP.PRO     | Oropharyngeal swab    | PRO     | CORE0207  | V2        | COVID       | Human        | None        | No        | 147.16         | 22.99              | 4.4              |
| CORE0207.V3.COVID.NP.PRO     | Nasopharyngeal swab   | PRO     | CORE0207  | V3        | COVID       | Human        | None        | No        | 4.09           | 1.69               | 38               |
| CORE0207.V3.COVID.OP.PRO     | Oropharyngeal swab    | PRO     | CORE0207  | V3        | COVID       | Human        | None        | No        | 16.24          | 53.19              | 1.9              |
| CORE0208.V1.COVID.NP.PRO     | Nasopharyngeal swab   | PRO     | CORE0208  | V1        | COVID       | Human        | None        | No        | 36.3           | 51.51              | 1.9              |
| CORE0208.V1.COVID.OP.PRO     | Oropharyngeal swab    | PRO     | CORE0208  | V1        | COVID       | Human        | None        | No        | 4.63           | 15.51              | 6.5              |
| CORE0208.V2.COVID.NP.PRO     | Nasopharyngeal swab   | PRO     | CORE0208  | V2        | COVID       | Human        | None        | No        | 5.45           | 38.85              | 2.6              |
| CORE0208.V2.COVID.OP.PRO     | Oropharyngeal swab    | PRO     | CORE0208  | V2        | COVID       | Human        | None        | No        | 4.09           | 32.53              | 3.1              |
| CORE0209.V1.COVID.NP.PRO     | Nasopharyngeal swab   | PRO     | CORE0209  | V1        | COVID       | Human        | None        | No        | 11.55          | 5.27               | 19               |
| CORE0209.V1.COVID.OP.PRO     | Oropharyngeal swab    | PRO     | CORE0209  | V1        | COVID       | Human        | None        | No        | 18.97          | 88.78              | 1.5              |
| CORE0209.V2.COVID.ETA.PRO    | Endotracheal aspirate | PRO     | CORE0209  | V2        | COVID       | Human        | None        | No        | None           | 6.14               | 16.3             |
| CORE0209.V2.COVID.NP.PRO     | Nasopharyngeal swab   | PRO     | CORE0209  | V2        | COVID       | Human        | None        | No        | 114.11         | 43.95              | 2.3              |
| CORE0209.V2.COVID.OP.PRO     | Oropharyngeal swab    | PRO     | CORE0209  | V2        | COVID       | Human        | None        | No        | 43.76          | 86.3               | 1.5              |
| CORE0209.V3.COVID.NP.PRO     | Nasopharyngeal swab   | PRO     | CORE0209  | V3        | COVID       | Human        | None        | No        | 69.03          | 19.16              | 5.2              |
| CORE0209.V3.COVID.OP.PRO     | Oropharyngeal swab    | PRO     | CORE0209  | V3        | COVID       | Human        | None        | No        | 2.13           | 71.62              | 1.5              |
| CORE0216.V1.COVID.OP.PRO     | Oropharyngeal swab    | PRO     | CORE0216  | V1        | COVID       | Human        | None        | No        | 114.77         | 47.01              | 2.1              |
| CORE0216.V2.COVID.OP.PRO     | Oropharyngeal swab    | PRO     | CORE0216  | V2        | COVID       | Human        | None        | No        | 91.09          | 73.22              | 1.5              |
| CORE0216.V3.COVID.OP.PRO     | Oropharyngeal swab    | PRO     | CORE0216  | V3        | COVID       | Human        | None        | No        | 41.99          | 88.29              | 1.5              |
| CORE0216.V4.COVID.OP.PRO     | Oropharyngeal swab    | PRO     | CORE0216  | V4        | COVID       | Human        | None        | No        | 43.76          | 2.3                | 38               |
| CORE0220.V1.COVID.NP.PRO     | Nasopharyngeal swab   | PRO     | CORE0220  | V1        | COVID       | Human        | None        | No        | 16.61          | 57.65              | 1.7              |
| CORE0220.V1.COVID.OP.PRO     | Oropharyngeal swab    | PRO     | CORE0220  | V1        | COVID       | Human        | None        | No        | 6.39           | 71.01              | 1.5              |
| CORE0223.V1.COVID.OP.PRO     | Oropharyngeal swab    | PRO     | CORE0223  | V1        | COVID       | Human        | None        | No        | None           | 58.72              | 1.7              |
| CORE0223.V2.COVID.OP.PRO     | Oropharyngeal swab    | PRO     | CORE0223  | V2        | COVID       | Human        | None        | No        | None           | 43.47              | 2.3              |
| CORE0224.V1.COVID.OP.PRO     | Oropharyngeal swab    | PRO     | CORE0224  | V1        | COVID       | Human        | None        | No        | None           | 80.08              | 1.5              |
| CORE0229.V1.COVID.NP.PRO     | Nasopharyngeal swab   | PRO     | CORE0229  | V1        | COVID       | Human        | None        | No        | None           | 58.11              | 1.7              |
| CORE0229.V1.COVID.OP.PRO     | Oropharyngeal swab    | PRO     | CORE0229  | V1        | COVID       | Human        | None        | No        | None           | 74.99              | 1.5              |
| CORE0232.V1.COVID.NP.PRO     | Nasopharyngeal swab   | PRO     | CORE0232  | V1        | COVID       | Human        | None        | No        | None           | 35.21              | 2.8              |
| CORE0232.V1.COVID.OP.PRO     | Oropharyngeal swab    | PRO     | CORE0232  | V1        | COVID       | Human        | None        | No        | None           | 81.21              | 1.5              |
| CORE0232.V2.COVID.NP.PRO     | Nasopharyngeal swab   | PRO     | CORE0232  | V2        | COVID       | Human        | None        | No        | None           | 61.08              | 1.6              |
| CORE0232.V2.COVID.OP.PRO     | Oropharyngeal swab    | PRO     | CORE0232  | V2        | COVID       | Human        | None        | No        | None           | 77.88              | 1.5              |
| CORE0234.V1.COVID.NP.PRO     | Nasopharyngeal swab   | PRO     | CORE0234  | V1        | COVID       | Human        | None        | No        | None           | 49.79              | 2                |
| CORE0234.V1.COVID.OP.PRO     | Oropharyngeal swab    | PRO     | CORE0234  | V1        | COVID       | Human        | None        | No        | None           | 75.64              | 1.5              |
| CORE0234.V2.COVID.NP.PRO     | Nasopharyngeal swab   | PRO     | CORE0234  | V2        | COVID       | Human        | None        | No        | None           | 60.16              | 1.7              |
| CORE0234.V2.COVID.OP.PRO     | Oropharyngeal swab    | PRO     | CORE0234  | V2        | COVID       | Human        | None        | No        | None           | 85.33              | 1.5              |
| CORE0235.V1.COVID.NP.PRO     | Nasopharyngeal swab   | PRO     | CORE0235  | V1        | COVID       | Human        | None        | No        | None           | 66.33              | 1.5              |
| CORE0235.V1.COVID.OP.PRO     | Oropharyngeal swab    | PRO     | CORE0235  | V1        | COVID       | Human        | None        | No        | None           | 94.83              | 1.5              |
| CORE0235.V2.COVID.NP.PRO     | Nasopharyngeal swab   | PRO     | CORE0235  | V2        | COVID       | Human        | None        | No        | None           | 82.98              | 1.5              |
| CORE0235.V2.COVID.OP.PRO     | Oropharyngeal swab    | PRO     | CORE0235  | V2        | COVID       | Human        | None        | No        | None           | 75.78              | 1.5              |
| CORE0235.V3.COVID.NP.PRO     | Nasopharyngeal swab   | PRO     | CORE0235  | V3        | COVID       | Human        | None        | No        | None           | 61.9               | 1.6              |
| CORE0235.V3.COVID.OP.PRO     | Oropharyngeal swab    | PRO     | CORE0235  | V3        | COVID       | Human        | None        | No        | None           | 79.77              | 1.5              |
| CORE0246.V1.COVID.NP.PRO     | Nasopharyngeal swab   | PRO     | CORE0246  | V1        | COVID       | Human        | None        | No        | None           | 10.29              | 9.7              |
| CORE0246.V1.COVID.OP.PRO     | Oropharyngeal swab    | PRO     | CORE0246  | V1        | COVID       | Human        | None        | No        | None           | 45.35              | 2.2              |
| CORE0248.V1.COVID.NP.PRO     | Nasopharyngeal swab   | PRO     | CORE0248  | V1        | COVID       | Human        | None        | No        | None           | 49.3               | 2                |
| CORE0248.V1.COVID.OP.PRO     | Oropharyngeal swab    | PRO     | CORE0248  | V1        | COVID       | Human        | None        | No        | None           | 46.79              | 2.1              |
| CORE0248.V2.COVID.ETA.PRO    | Endotracheal aspirate | PRO     | CORE0248  | V2        | COVID       | Human        | None        | No        | 139.87         | 12.54              | 8                |
| CORE0248.V2.COVID.NP.PRO     | Nasopharyngeal swab   | PRO     | CORE0248  | V2        | COVID       | Human        | None        | No        | None           | 49.76              | 2                |
| CORE0248.V2.COVID.OP.PRO     | Oropharyngeal swab    | PRO     | CORE0248  | V2        | COVID       | Human        | None        | No        | None           | 40.67              | 2.5              |
| CORE0248.V3.COVID.ETA.PRO    | Endotracheal aspirate | PRO     | CORE0248  | V3        | COVID       | Human        | None        | No        | 165.45         | 23.55              | 4.3              |
| CORE0248.V3.COVID.NP.PRO     | Nasopharyngeal swab   | PRO     | CORE0248  | V3        | COVID       | Human        | None        | No        | None           | 60.31              | 1.7              |
| CORE0248.V3.COVID.OP.PRO     | Oropharyngeal swab    | PRO     | CORE0248  | V3        | COVID       | Human        | None        | No        | None           | 53.56              | 1.9              |
| CORE0248.V4.COVID.ETA.PRO    | Endotracheal aspirate | PRO     | CORE0248  | V4        | COVID       | Human        | None        | No        | 102.93         | 16.88              | 5.9              |
| CORE0248.V4.COVID.NP.PRO     | Nasopharyngeal swab   | PRO     | CORE0248  | V4        | COVID       | Human        | None        | No        | None           | 73.71              | 1.5              |
| CORE0248.V4.COVID.OP.PRO     | Oropharyngeal swab    | PRO     | CORE0248  | V4        | COVID       | Human        | None        | No        | None           | 61.64              | 1.6              |
| CORE0248.V5.COVID.ETA.PRO    | Endotracheal aspirate | PRO     | CORE0248  | V5        | COVID       | Human        | None        | No        | 95.69          | 11.67              | 8.6              |
| CORE0248.V5.COVID.NP.PRO     | Nasopharyngeal swab   | PRO     | CORE0248  | V5        | COVID       | Human        | None        | No        | None           | 53.83              | 1.9              |
| CORE0248.V5.COVID.OP.PRO     | Oropharyngeal swab    | PRO     | CORE0248  | V5        | COVID       | Human        | None        | No        | None           | 51.71              | 1.9              |
| CORE0248.V6.COVID.ETA.PRO    | Endotracheal aspirate | PRO     | CORE0248  | V6        | COVID       | Human        | None        | No        | 113.4          | 13.46              | 7.4              |
| CORE0248.V6.COVID.NP.PRO     | Nasopharyngeal swab   | PRO     | CORE0248  | V6        | COVID       | Human        | None        | No        | None           | 57.96              | 1.7              |
| CORE0248.V6.COVID.OP.PRO     | Oropharyngeal swab    | PRO     | CORE0248  | V6        | COVID       | Human        | None        | No        | None           | 56.43              | 1.8              |
| CORE0251.V1.COVID.NP.PRO     | Nasopharyngeal swab   | PRO     | CORE0251  | V1        | COVID       | Human        | None        | No        | None           | 41.3               | 2.4              |
| CORE0251.V1.COVID.OP.PRO     | Oropharyngeal swab    | PRO     | CORE0251  | V1        | COVID       | Human        | None        | No        | None           | 55.97              | 1.8              |
| CORE0251.V2.COVID.ETA.PRO    | Endotracheal aspirate | PRO     | CORE0251  | V2        | COVID       | Human        | None        | No        | 6.25           | 16.4               | 6.1              |
| CORE0251.V2.COVID.NP.PRO     | Nasopharyngeal swab   | PRO     | CORE0251  | V2        | COVID       | Human        | None        | No        | None           | 20.57              | 4.9              |
| CORE0251.V2.COVID.OP.PRO     | Oropharyngeal swab    | PRO     | CORE0251  | V2        | COVID       | Human        | None        | No        | None           | 52.53              | 1.9              |
| CORE0251.V3.COVID.NP.PRO     | Nasopharyngeal swab   | PRO     | CORE0251  | V3        | COVID       | Human        | None        | No        | None           | 38.53              | 2.6              |
| CORE0251.V3.COVID.OP.PRO     | Oropharyngeal swab    | PRO     | CORE0251  | V3        | COVID       | Human        | None        | No        | None           | 45.3               | 2.2              |
| CORE0251.V4.COVID.NP.PRO     | Nasopharyngeal swab   | PRO     | CORE0251  | V4        | COVID       | Human        | None        | No        | None           | 38.11              | 2.6              |
| CORE0251.V4.COVID.OP.PRO     | Oropharyngeal swab    | PRO     | CORE0251  | V4        | COVID       | Human        | None        | No        | None           | 60.32              | 1.7              |
| CORE0254.V1.COVID.NP.PRO     | Nasopharyngeal swab   | PRO     | CORE0254  | V1        | COVID       | Human        | None        | No        | None           | 54.81              | 1.8              |
| CORE0254.V1.COVID.OP.PRO     | Oropharyngeal swab    | PRO     | CORE0254  | V1        | COVID       | Human        | None        | No        | None           | 62.05              | 1.6              |
| CORE0254.V2.COVID.NP.PRO     | Nasopharyngeal swab   | PRO     | CORE0254  | V2        | COVID       | Human        | None        | No        | None           | 43.02              | 2.3              |
| CORE0254.V2.COVID.OP.PRO     | Oropharyngeal swab    | PRO     | CORE0254  | V2        | COVID       | Human        | None        | No        | None           | 68.44              | 1.5              |
| CORE0260.V1.COVID.NP.PRO     | Nasopharyngeal swab   | PRO     | CORE0260  | V1        | COVID       | Human        | None        | No        | None           | 23.72              | 4.2              |
| CORE0260.V1.COVID.OP.PRO     | Oropharyngeal swab    | PRO     | CORE0260  | V1        | COVID       | Human        | None        | No        | None           | 61.27              | 1.6              |
| CORE0260.V2.COVID.NP.PRO     | Nasopharyngeal swab   | PRO     | CORE0260  | V2        | COVID       | Human        | None        | No        | None           | 59.03              | 1.7              |

|                              |                       |     |          |    |           |       |      |    |        |        |      |
|------------------------------|-----------------------|-----|----------|----|-----------|-------|------|----|--------|--------|------|
| CORE0260.V2.COVID.OP.PRO     | Oropharyngeal swab    | PRO | CORE0260 | V2 | COVID     | Human | None | No | None   | 69.46  | 1.5  |
| CORE0260.V3.COVID.NP.PRO     | Nasopharyngeal swab   | PRO | CORE0260 | V3 | COVID     | Human | None | No | None   | 26.81  | 3.7  |
| CORE0260.V3.COVID.OP.PRO     | Oropharyngeal swab    | PRO | CORE0260 | V3 | COVID     | Human | None | No | None   | 67.66  | 1.5  |
| CORE0260.V4.COVID.NP.PRO     | Nasopharyngeal swab   | PRO | CORE0260 | V4 | COVID     | Human | None | No | None   | 46.55  | 2.2  |
| CORE0260.V4.COVID.OP.PRO     | Oropharyngeal swab    | PRO | CORE0260 | V4 | COVID     | Human | None | No | None   | 64.59  | 1.6  |
| CORE0264.V2.COVID.ETA.PRO    | Endotracheal aspirate | PRO | CORE0264 | V2 | COVID     | Human | None | No | 3.93   | 41.96  | 2.4  |
| CORE0264.V2.COVID.NP.PRO     | Nasopharyngeal swab   | PRO | CORE0264 | V2 | COVID     | Human | None | No | None   | 0.24   | 38   |
| CORE0264.V2.COVID.OP.PRO     | Oropharyngeal swab    | PRO | CORE0264 | V2 | COVID     | Human | None | No | None   | 69.17  | 1.5  |
| CORE0269.V1.COVID.NP.PRO     | Nasopharyngeal swab   | PRO | CORE0269 | V1 | COVID     | Human | None | No | None   | 23.62  | 4.2  |
| CORE0269.V2.COVID.ETA.PRO    | Endotracheal aspirate | PRO | CORE0269 | V2 | COVID     | Human | None | No | 84.53  | 9.44   | 10.6 |
| CORE0269.V2.COVID.NP.PRO     | Nasopharyngeal swab   | PRO | CORE0269 | V2 | COVID     | Human | None | No | None   | 36.22  | 2.8  |
| CORE0269.V2.COVID.OP.PRO     | Oropharyngeal swab    | PRO | CORE0269 | V2 | COVID     | Human | None | No | None   | 59.77  | 1.7  |
| CORE0269.V3.COVID.ETA.PRO    | Endotracheal aspirate | PRO | CORE0269 | V3 | COVID     | Human | None | No | 135.6  | 11.59  | 8.6  |
| CORE0269.V3.COVID.NP.PRO     | Nasopharyngeal swab   | PRO | CORE0269 | V3 | COVID     | Human | None | No | None   | 9.25   | 10.8 |
| CORE0269.V3.COVID.OP.PRO     | Oropharyngeal swab    | PRO | CORE0269 | V3 | COVID     | Human | None | No | None   | 42.77  | 2.3  |
| CORE0269.V4.COVID.ETA.PRO    | Endotracheal aspirate | PRO | CORE0269 | V4 | COVID     | Human | None | No | 45.92  | 24.54  | 4.1  |
| CORE0269.V4.COVID.NP.PRO     | Nasopharyngeal swab   | PRO | CORE0269 | V4 | COVID     | Human | None | No | None   | 1.6    | 36   |
| CORE0269.V4.COVID.OP.PRO     | Oropharyngeal swab    | PRO | CORE0269 | V4 | COVID     | Human | None | No | None   | 60.23  | 1.7  |
| CORE0269.V5.COVID.NP.PRO     | Nasopharyngeal swab   | PRO | CORE0269 | V5 | COVID     | Human | None | No | None   | 11.01  | 9.1  |
| CORE0269.V5.COVID.OP.PRO     | Oropharyngeal swab    | PRO | CORE0269 | V5 | COVID     | Human | None | No | None   | 63.87  | 1.5  |
| CORE0270.V1.COVID.NP.PRO     | Nasopharyngeal swab   | PRO | CORE0270 | V1 | COVID     | Human | None | No | None   | 0.61   | 36   |
| CORE0270.V1.COVID.OP.PRO     | Oropharyngeal swab    | PRO | CORE0270 | V1 | COVID     | Human | None | No | None   | 0.21   | 36   |
| CORE0277.V1.COVID.NP.PRO     | Nasopharyngeal swab   | PRO | CORE0277 | V1 | COVID     | Human | None | No | None   | 0.42   | 36   |
| CORE0277.V1.COVID.OP.PRO     | Oropharyngeal swab    | PRO | CORE0277 | V1 | COVID     | Human | None | No | None   | 0.35   | 36   |
| CORE0277.V2.COVID.NP.PRO     | Nasopharyngeal swab   | PRO | CORE0277 | V2 | COVID     | Human | None | No | None   | 3.06   | 32.7 |
| CORE0277.V2.COVID.OP.PRO     | Oropharyngeal swab    | PRO | CORE0277 | V2 | COVID     | Human | None | No | None   | 6.57   | 15.2 |
| CORE0279.V1.COVID.NP.PRO     | Nasopharyngeal swab   | PRO | CORE0279 | V1 | COVID     | Human | None | No | None   | 35.82  | 2.8  |
| CORE0279.V1.COVID.OP.PRO     | Oropharyngeal swab    | PRO | CORE0279 | V1 | COVID     | Human | None | No | None   | 52.69  | 1.9  |
| CORE0284.V1.COVID.NP.PRO     | Nasopharyngeal swab   | PRO | CORE0284 | V1 | COVID     | Human | None | No | None   | 59.08  | 1.7  |
| CORE0284.V1.COVID.OP.PRO     | Oropharyngeal swab    | PRO | CORE0284 | V1 | COVID     | Human | None | No | None   | 70.51  | 1.5  |
| CORE0286.V1.COVID.NP.PRO     | Nasopharyngeal swab   | PRO | CORE0286 | V1 | COVID     | Human | None | No | None   | 1.2    | 38   |
| CORE0286.V1.COVID.OP.PRO     | Oropharyngeal swab    | PRO | CORE0286 | V1 | COVID     | Human | None | No | None   | 1.73   | 38   |
| CORE0286.V2.COVID.NP.PRO     | Nasopharyngeal swab   | PRO | CORE0286 | V2 | COVID     | Human | None | No | None   | 4.7    | 21.3 |
| CORE0286.V2.COVID.OP.PRO     | Oropharyngeal swab    | PRO | CORE0286 | V2 | COVID     | Human | None | No | None   | 10.48  | 9.5  |
| CORE0292.V1.COVID.NP.PRO     | Nasopharyngeal swab   | PRO | CORE0292 | V1 | COVID     | Human | None | No | None   | 42.5   | 2.4  |
| CORE0292.V1.COVID.OP.PRO     | Oropharyngeal swab    | PRO | CORE0292 | V1 | COVID     | Human | None | No | None   | 51.84  | 1.9  |
| CORE0295.V1.nonCOVID.NP.PRO  | Nasopharyngeal swab   | PRO | CORE0295 | V1 | non COVID | Human | None | No | None   | 2.18   | 38   |
| CORE0295.V1.nonCOVID.NP.P5   | Nasopharyngeal swab   | P5  | CORE0295 | V1 | non COVID | Human | None | No | None   | 20.83  | 4.8  |
| CORE0295.V1.nonCOVID.OP.PRO  | Oropharyngeal swab    | PRO | CORE0295 | V1 | non COVID | Human | None | No | None   | 8.48   | 11.8 |
| CORE0295.V1.nonCOVID.OP.P5   | Oropharyngeal swab    | P5  | CORE0295 | V1 | non COVID | Human | None | No | None   | 15.68  | 6.4  |
| CORE0266.V1.COVID.NP.PRO     | Nasopharyngeal swab   | PRO | CORE0266 | V1 | COVID     | Human | None | No | None   | 3.47   | 28.8 |
| CORE0266.V1.COVID.OP.PRO     | Oropharyngeal swab    | PRO | CORE0266 | V1 | COVID     | Human | None | No | None   | 62.66  | 1.6  |
| CORE0266.V2.COVID.NP.PRO     | Nasopharyngeal swab   | PRO | CORE0266 | V2 | COVID     | Human | None | No | None   | 9.64   | 10.4 |
| CORE0266.V2.COVID.OP.PRO     | Oropharyngeal swab    | PRO | CORE0266 | V2 | COVID     | Human | None | No | None   | 62.6   | 1.6  |
| CORE0185.V1.nonCOVID.NP.P5   | Nasopharyngeal swab   | P5  | CORE0185 | V1 | non COVID | Human | None | No | None   | 27.14  | 3.7  |
| CORE0185.V1.nonCOVID.OP.P5   | Oropharyngeal swab    | P5  | CORE0185 | V1 | non COVID | Human | None | No | None   | 58.44  | 1.7  |
| CORE0185.V2.nonCOVID.ETA.PRO | Endotracheal aspirate | PRO | CORE0185 | V2 | non COVID | Human | None | No | None   | 0.26   | 38   |
| CORE0185.V2.nonCOVID.NP.P5   | Nasopharyngeal swab   | P5  | CORE0185 | V2 | non COVID | Human | None | No | None   | 8.76   | 11.4 |
| CORE0185.V2.nonCOVID.OP.P5   | Oropharyngeal swab    | P5  | CORE0185 | V2 | non COVID | Human | None | No | None   | 2.73   | 36.6 |
| CORE0185.V3.nonCOVID.NP.P5   | Nasopharyngeal swab   | P5  | CORE0185 | V3 | non COVID | Human | None | No | None   | 7.22   | 13.9 |
| CORE0185.V3.nonCOVID.OP.P5   | Oropharyngeal swab    | P5  | CORE0185 | V3 | non COVID | Human | None | No | None   | 13.91  | 7.2  |
| CORE0185.V4.nonCOVID.NP.P5   | Nasopharyngeal swab   | P5  | CORE0185 | V4 | non COVID | Human | None | No | None   | 8.21   | 12.2 |
| CORE0185.V4.nonCOVID.OP.P5   | Oropharyngeal swab    | P5  | CORE0185 | V4 | non COVID | Human | None | No | None   | 9.14   | 10.9 |
| CORE0193.V5.COVID.NP.PRO     | Nasopharyngeal swab   | PRO | CORE0193 | V5 | COVID     | Human | None | No | 0.16   | 13.86  | 7.2  |
| CORE0193.V5.COVID.OP.PRO     | Oropharyngeal swab    | PRO | CORE0193 | V5 | COVID     | Human | None | No | 2.64   | 49.73  | 2    |
| CORE0213.V1.COVID.NP.PRO     | Nasopharyngeal swab   | PRO | CORE0213 | V1 | COVID     | Human | None | No | 48.18  | 73.4   | 1.5  |
| CORE0213.V1.COVID.OP.PRO     | Oropharyngeal swab    | PRO | CORE0213 | V1 | COVID     | Human | None | No | 11.26  | 55.21  | 1.8  |
| CORE0213.V2.COVID.NP.PRO     | Nasopharyngeal swab   | PRO | CORE0213 | V2 | COVID     | Human | None | No | 63.33  | 73.38  | 1.5  |
| CORE0213.V2.COVID.OP.PRO     | Oropharyngeal swab    | PRO | CORE0213 | V2 | COVID     | Human | None | No | 13.61  | 53.91  | 1.9  |
| CORE0213.V3.COVID.ETA.PRO    | Endotracheal aspirate | PRO | CORE0213 | V3 | COVID     | Human | None | No | 30.55  | 14.67  | 6.8  |
| CORE0213.V3.COVID.NP.PRO     | Nasopharyngeal swab   | PRO | CORE0213 | V3 | COVID     | Human | None | No | 4.83   | 101.07 | 1.5  |
| CORE0213.V3.COVID.OP.PRO     | Oropharyngeal swab    | PRO | CORE0213 | V3 | COVID     | Human | None | No | 16.61  | 51.46  | 1.9  |
| CORE0233.V1.COVID.NP.PRO     | Nasopharyngeal swab   | PRO | CORE0233 | V1 | COVID     | Human | None | No | None   | 56.5   | 1.8  |
| CORE0233.V1.COVID.OP.PRO     | Oropharyngeal swab    | PRO | CORE0233 | V1 | COVID     | Human | None | No | None   | 74.48  | 1.5  |
| CORE0233.V2.COVID.NP.PRO     | Nasopharyngeal swab   | PRO | CORE0233 | V2 | COVID     | Human | None | No | None   | 39.09  | 2.6  |
| CORE0233.V2.COVID.OP.PRO     | Oropharyngeal swab    | PRO | CORE0233 | V2 | COVID     | Human | None | No | None   | 58.05  | 1.7  |
| CORE0233.V3.COVID.NP.PRO     | Nasopharyngeal swab   | PRO | CORE0233 | V3 | COVID     | Human | None | No | None   | 54.73  | 1.8  |
| CORE0233.V3.COVID.OP.PRO     | Oropharyngeal swab    | PRO | CORE0233 | V3 | COVID     | Human | None | No | None   | 65.28  | 1.5  |
| CORE0233.V4.COVID.NP.PRO     | Nasopharyngeal swab   | PRO | CORE0233 | V4 | COVID     | Human | None | No | None   | 61.66  | 1.6  |
| CORE0233.V4.COVID.OP.PRO     | Oropharyngeal swab    | PRO | CORE0233 | V4 | COVID     | Human | None | No | None   | 43.85  | 2.3  |
| CORE0238.V1.COVID.NP.PRO     | Nasopharyngeal swab   | PRO | CORE0238 | V1 | COVID     | Human | None | No | None   | 15.28  | 6.5  |
| CORE0238.V1.COVID.OP.PRO     | Oropharyngeal swab    | PRO | CORE0238 | V1 | COVID     | Human | None | No | None   | 46.39  | 2.2  |
| CORE0252.V1.COVID.NP.PRO     | Nasopharyngeal swab   | PRO | CORE0252 | V1 | COVID     | Human | None | No | None   | 33.43  | 3    |
| CORE0252.V1.COVID.OP.PRO     | Oropharyngeal swab    | PRO | CORE0252 | V1 | COVID     | Human | None | No | None   | 37.67  | 2.7  |
| CORE0252.V2.COVID.ETA.PRO    | Endotracheal aspirate | PRO | CORE0252 | V2 | COVID     | Human | None | No | 123.18 | 23.14  | 4.3  |
| CORE0252.V2.COVID.NP.PRO     | Nasopharyngeal swab   | PRO | CORE0252 | V2 | COVID     | Human | None | No | None   | 24.38  | 4.1  |
| CORE0252.V2.COVID.OP.PRO     | Oropharyngeal swab    | PRO | CORE0252 | V2 | COVID     | Human | None | No | None   | 56.34  | 1.8  |
| CORE0252.V3.COVID.ETA.PRO    | Endotracheal aspirate | PRO | CORE0252 | V3 | COVID     | Human | None | No | 130.09 | 12.05  | 8.3  |
| CORE0252.V3.COVID.NP.PRO     | Nasopharyngeal swab   | PRO | CORE0252 | V3 | COVID     | Human | None | No | None   | 42.67  | 2.3  |
| CORE0252.V3.COVID.OP.PRO     | Oropharyngeal swab    | PRO | CORE0252 | V3 | COVID     | Human | None | No | None   | 58.05  | 1.7  |
| CORE0252.V4.COVID.NP.PRO     | Nasopharyngeal swab   | PRO | CORE0252 | V4 | COVID     | Human | None | No | None   | 7.82   | 12.8 |
| CORE0252.V4.COVID.OP.PRO     | Oropharyngeal swab    | PRO | CORE0252 | V4 | COVID     | Human | None | No | None   | 69.16  | 1.5  |
| CORE0252.V5.COVID.ETA.PRO    | Endotracheal aspirate | PRO | CORE0252 | V5 | COVID     | Human | None | No | 13.71  | 36.64  | 2.7  |
| CORE0252.V5.COVID.NP.PRO     | Nasopharyngeal swab   | PRO | CORE0252 | V5 | COVID     | Human | None | No | None   | 33.54  | 3    |
| CORE0252.V5.COVID.OP.PRO     | Oropharyngeal swab    | PRO | CORE0252 | V5 | COVID     | Human | None | No | None   | 72.17  | 1.5  |
| CORE0252.V6.COVID.NP.PRO     | Nasopharyngeal swab   | PRO | CORE0252 | V6 | COVID     | Human | None | No | None   | 41.79  | 2.4  |
| CORE0252.V6.COVID.OP.PRO     | Oropharyngeal swab    | PRO | CORE0252 | V6 | COVID     | Human | None | No | None   | 53.87  | 1.9  |
| CORE0262.V1.COVID.NP.PRO     | Nasopharyngeal swab   | PRO | CORE0262 | V1 | COVID     | Human | None | No | None   | 46.91  | 2.1  |
| CORE0262.V2.COVID.NP.PRO     | Nasopharyngeal swab   | PRO | CORE0262 | V2 | COVID     | Human | None | No | None   | 60.17  | 1.7  |
| CORE0262.V2.COVID.OP.PRO     | Oropharyngeal swab    | PRO | CORE0262 | V2 | COVID     | Human | None | No | None   | 53.26  | 1.9  |
| CORE0263.V1.COVID.ETA.PRO    | Endotracheal aspirate | PRO | CORE0263 | V1 | COVID     | Human | None | No | 67.62  | 2.72   | 36.8 |
| CORE0263.V1.COVID.NP.PRO     | Nasopharyngeal swab   | PRO | CORE0263 | V1 | COVID     | Human | None | No | None   | 4.23   | 2.4  |
| CORE0263.V1.COVID.OP.PRO     | Oropharyngeal swab    | PRO | CORE0263 | V1 | COVID     | Human | None | No | None   | 61.02  | 1.6  |
| CORE0263.V2.COVID.NP.PRO     | Nasopharyngeal swab   | PRO | CORE0263 | V2 | COVID     | Human | None | No | None   | 63.05  | 1.6  |
| CORE0263.V2.COVID.OP.PRO     | Oropharyngeal swab    | PRO | CORE0263 | V2 | COVID     | Human | None | No | None   | 63.78  | 1.6  |
| CORE0263.V3.COVID.NP.PRO     | Nasopharyngeal swab   | PRO | CORE0263 | V3 | COVID     | Human | None | No | None   | 64.6   | 1.6  |
| CORE0263.V3.COVID.OP.PRO     | Oropharyngeal swab    | PRO | CORE0263 | V3 | COVID     | Human | None | No | None   | 63.11  | 1.6  |
| CORE0263.V4.COVID.NP.PRO     | Nasopharyngeal swab   | PRO | CORE0263 | V4 | COVID     | Human | None | No | None   | 69.92  | 1.5  |
| CORE0263.V4.COVID.OP.PRO     | Oropharyngeal swab    | PRO | CORE0263 | V4 | COVID     | Human | None | No | None   | 63.91  | 1.6  |
| CORE0263.V5.COVID.ETA.PRO    | Endotracheal aspirate | PRO | CORE0263 | V5 | COVID     | Human | None | No | 89.08  | 13.15  | 7.6  |
| CORE0263.V5.COVID.NP.PRO     | Nasopharyngeal swab   | PRO | CORE0263 | V5 | COVID     | Human | None | No | None   | 26.66  | 3.8  |
| CORE0263.V5.COVID.OP.PRO     | Oropharyngeal swab    | PRO | CORE0263 | V5 | COVID     | Human | None | No | None   | 64.32  | 1.6  |
| CORE0263.V6.COVID.ETA.PRO    | Endotracheal aspirate | PRO | CORE0263 | V6 | COVID     | Human | None | No | 113.36 | 30.33  | 3.3  |
| CORE0263.V6.COVID.NP.PRO     | Nasopharyngeal swab   | PRO | CORE0263 | V6 | COVID     | Human | None | No | None   | 47.58  | 2.1  |
| CORE0263.V6.COVID.OP.PRO     | Oropharyngeal swab    | PRO | CORE0263 | V6 | COVID     | Human | None | No | None   | 61.44  | 1.6  |
| CORE0272.V1.COVID.NP.PRO     | Nasopharyngeal swab   | PRO | CORE0272 | V1 | COVID     | Human | None | No | None   | 41.45  | 2.4  |
| CORE0272.V1.COVID.OP.PRO     | Oropharyngeal swab    | PRO | CORE0272 | V1 | COVID     | Human | None | No | None   | 65.64  | 1.5  |

|                            |                       |     |          |    |           |       |      |    |        |       |      |
|----------------------------|-----------------------|-----|----------|----|-----------|-------|------|----|--------|-------|------|
| CORE0272.V2.COVID.ETA.PRO  | Endotracheal aspirate | PRO | CORE0272 | V2 | COVID     | Human | None | No | 90.59  | 10.32 | 9.7  |
| CORE0272.V2.COVID.NP.PRO   | Nasopharyngeal swab   | PRO | CORE0272 | V2 | COVID     | Human | None | No | None   | 36.5  | 2.7  |
| CORE0272.V2.COVID.OP.PRO   | Oropharyngeal swab    | PRO | CORE0272 | V2 | COVID     | Human | None | No | None   | 55.76 | 1.8  |
| CORE0272.V3.COVID.NP.PRO   | Nasopharyngeal swab   | PRO | CORE0272 | V3 | COVID     | Human | None | No | None   | 0.25  | 36   |
| CORE0272.V3.COVID.OP.PRO   | Oropharyngeal swab    | PRO | CORE0272 | V3 | COVID     | Human | None | No | None   | 0.38  | 36   |
| CORE0272.V4.COVID.NP.PRO   | Nasopharyngeal swab   | PRO | CORE0272 | V4 | COVID     | Human | None | No | None   | 15.07 | 6.6  |
| CORE0272.V4.COVID.OP.PRO   | Oropharyngeal swab    | PRO | CORE0272 | V4 | COVID     | Human | None | No | None   | 65.11 | 1.5  |
| CORE0272.V5.COVID.ETA.PRO  | Endotracheal aspirate | PRO | CORE0272 | V5 | COVID     | Human | None | No | 72     | 72.39 | 1.5  |
| CORE0272.V5.COVID.NP.PRO   | Nasopharyngeal swab   | PRO | CORE0272 | V5 | COVID     | Human | None | No | None   | 12.99 | 7.7  |
| CORE0272.V5.COVID.OP.PRO   | Oropharyngeal swab    | PRO | CORE0272 | V5 | COVID     | Human | None | No | None   | 64.15 | 1.6  |
| CORE0272.V6.COVID.NP.PRO   | Nasopharyngeal swab   | PRO | CORE0272 | V6 | COVID     | Human | None | No | None   | 32.79 | 3.1  |
| CORE0272.V6.COVID.OP.PRO   | Oropharyngeal swab    | PRO | CORE0272 | V6 | COVID     | Human | None | No | None   | 65.31 | 1.5  |
| CORE0289.V1.COVID.NP.PRO   | Nasopharyngeal swab   | PRO | CORE0289 | V1 | COVID     | Human | None | No | None   | 82.36 | 1.5  |
| CORE0289.V1.COVID.OP.PRO   | Oropharyngeal swab    | PRO | CORE0289 | V1 | COVID     | Human | None | No | None   | 63.32 | 1.6  |
| CORE0179.V1.nonCOVID.NP.P5 | Nasopharyngeal swab   | P5  | CORE0179 | V1 | non COVID | Human | None | No | None   | 0.34  | 38   |
| CORE0179.V1.nonCOVID.OP.P5 | Oropharyngeal swab    | P5  | CORE0179 | V1 | non COVID | Human | None | No | None   | 12.73 | 7.9  |
| CORE0179.V2.nonCOVID.NP.P5 | Nasopharyngeal swab   | P5  | CORE0179 | V2 | non COVID | Human | None | No | None   | 0.73  | 38   |
| CORE0179.V2.nonCOVID.OP.P5 | Oropharyngeal swab    | P5  | CORE0179 | V2 | non COVID | Human | None | No | None   | 5.06  | 19.8 |
| CORE0182.V1.nonCOVID.NP.P5 | Nasopharyngeal swab   | P5  | CORE0182 | V1 | non COVID | Human | None | No | None   | 3.29  | 30.4 |
| CORE0182.V1.nonCOVID.OP.P5 | Oropharyngeal swab    | P5  | CORE0182 | V1 | non COVID | Human | None | No | None   | 10.74 | 9.3  |
| CORE0184.V1.nonCOVID.NP.P5 | Nasopharyngeal swab   | P5  | CORE0184 | V1 | non COVID | Human | None | No | None   | 6.25  | 16   |
| CORE0184.V1.nonCOVID.OP.P5 | Oropharyngeal swab    | P5  | CORE0184 | V1 | non COVID | Human | None | No | None   | 0.35  | 38   |
| CORE0190.V1.nonCOVID.NP.P5 | Nasopharyngeal swab   | P5  | CORE0190 | V1 | non COVID | Human | None | No | None   | 16.41 | 6.1  |
| CORE0190.V1.nonCOVID.OP.P5 | Oropharyngeal swab    | P5  | CORE0190 | V1 | non COVID | Human | None | No | None   | 0.21  | 38   |
| CORE0190.V2.nonCOVID.NP.P5 | Nasopharyngeal swab   | P5  | CORE0190 | V2 | non COVID | Human | None | No | None   | 0.71  | 38   |
| CORE0190.V2.nonCOVID.OP.P5 | Oropharyngeal swab    | P5  | CORE0190 | V2 | non COVID | Human | None | No | None   | 0.87  | 38   |
| CORE0196.V2.COVID.ETA.PRO  | Endotracheal aspirate | PRO | CORE0196 | V2 | COVID     | Human | None | No | None   | 48.06 | 2.1  |
| CORE0196.V3.COVID.ETA.PRO  | Endotracheal aspirate | PRO | CORE0196 | V3 | COVID     | Human | None | No | None   | 32.45 | 3.1  |
| CORE0196.V3.COVID.NP.PRO   | Nasopharyngeal swab   | PRO | CORE0196 | V3 | COVID     | Human | None | No | 73.91  | 41.25 | 2.4  |
| CORE0196.V3.COVID.OP.PRO   | Oropharyngeal swab    | PRO | CORE0196 | V3 | COVID     | Human | None | No | 81.98  | 33.65 | 3    |
| CORE0196.V4.COVID.NP.PRO   | Nasopharyngeal swab   | PRO | CORE0196 | V4 | COVID     | Human | None | No | 77.27  | 15.97 | 6.3  |
| CORE0196.V4.COVID.OP.PRO   | Oropharyngeal swab    | PRO | CORE0196 | V4 | COVID     | Human | None | No | 74.96  | 64.88 | 1.5  |
| CORE0196.V5.COVID.ETA.PRO  | Endotracheal aspirate | PRO | CORE0196 | V5 | COVID     | Human | None | No | None   | 13.45 | 7.4  |
| CORE0196.V5.COVID.NP.PRO   | Nasopharyngeal swab   | PRO | CORE0196 | V5 | COVID     | Human | None | No | 114.94 | 22.52 | 4.4  |
| CORE0196.V5.COVID.OP.PRO   | Oropharyngeal swab    | PRO | CORE0196 | V5 | COVID     | Human | None | No | 122.21 | 33.72 | 3    |
| CORE0196.V6.COVID.NP.PRO   | Nasopharyngeal swab   | PRO | CORE0196 | V6 | COVID     | Human | None | No | 64.8   | 40.18 | 2.5  |
| CORE0196.V6.COVID.OP.PRO   | Oropharyngeal swab    | PRO | CORE0196 | V6 | COVID     | Human | None | No | 119.63 | 24.03 | 4.2  |
| CORE0196.V7.COVID.NP.PRO   | Nasopharyngeal swab   | PRO | CORE0196 | V7 | COVID     | Human | None | No | 71.58  | 40.57 | 2.5  |
| CORE0196.V7.COVID.OP.PRO   | Oropharyngeal swab    | PRO | CORE0196 | V7 | COVID     | Human | None | No | 3.61   | 42.57 | 2.4  |
| CORE0197.V2.COVID.ETA.PRO  | Endotracheal aspirate | PRO | CORE0197 | V2 | COVID     | Human | None | No | None   | 15.7  | 6.4  |
| CORE0197.V3.COVID.NP.PRO   | Nasopharyngeal swab   | PRO | CORE0197 | V3 | COVID     | Human | None | No | 58.99  | 63.01 | 1.6  |
| CORE0197.V3.COVID.OP.PRO   | Oropharyngeal swab    | PRO | CORE0197 | V3 | COVID     | Human | None | No | 54.72  | 83.34 | 1.5  |
| CORE0197.V4.COVID.NP.PRO   | Nasopharyngeal swab   | PRO | CORE0197 | V4 | COVID     | Human | None | No | 111.91 | 71.11 | 1.5  |
| CORE0197.V4.COVID.OP.PRO   | Oropharyngeal swab    | PRO | CORE0197 | V4 | COVID     | Human | None | No | 60.22  | 51.34 | 2    |
| CORE0197.V5.COVID.NP.PRO   | Nasopharyngeal swab   | PRO | CORE0197 | V5 | COVID     | Human | None | No | 0.57   | 6     | 16.7 |
| CORE0197.V5.COVID.OP.PRO   | Oropharyngeal swab    | PRO | CORE0197 | V5 | COVID     | Human | None | No | 53.23  | 41.48 | 2.4  |
| CORE0197.V6.COVID.ETA.PRO  | Endotracheal aspirate | PRO | CORE0197 | V6 | COVID     | Human | None | No | None   | 22.84 | 4.4  |
| CORE0197.V6.COVID.NP.PRO   | Nasopharyngeal swab   | PRO | CORE0197 | V6 | COVID     | Human | None | No | 92.26  | 13.76 | 7.3  |
| CORE0197.V6.COVID.OP.PRO   | Oropharyngeal swab    | PRO | CORE0197 | V6 | COVID     | Human | None | No | 25.2   | 45.1  | 2.2  |
| CORE0200.V1.COVID.NP.PRO   | Nasopharyngeal swab   | PRO | CORE0200 | V1 | COVID     | Human | None | No | 84.52  | 11.84 | 8.5  |
| CORE0200.V1.COVID.OP.PRO   | Oropharyngeal swab    | PRO | CORE0200 | V1 | COVID     | Human | None | No | 1.78   | 53.5  | 1.9  |
| CORE0201.V1.COVID.NP.PRO   | Nasopharyngeal swab   | PRO | CORE0201 | V1 | COVID     | Human | None | No | 0.66   | 16.57 | 6    |
| CORE0201.V1.COVID.OP.PRO   | Oropharyngeal swab    | PRO | CORE0201 | V1 | COVID     | Human | None | No | 0.82   | 32.7  | 3.1  |
| CORE0202.V1.COVID.NP.PRO   | Nasopharyngeal swab   | PRO | CORE0202 | V1 | COVID     | Human | None | No | 15.32  | 49.21 | 2    |
| CORE0202.V1.COVID.OP.PRO   | Oropharyngeal swab    | PRO | CORE0202 | V1 | COVID     | Human | None | No | 2.7    | 46.85 | 2.1  |
| CORE0203.V1.COVID.ETA.PRO  | Endotracheal aspirate | PRO | CORE0203 | V1 | COVID     | Human | None | No | None   | 19.31 | 5.2  |
| CORE0203.V1.COVID.NP.PRO   | Nasopharyngeal swab   | PRO | CORE0203 | V1 | COVID     | Human | None | No | 66.16  | 40.05 | 2.5  |
| CORE0203.V1.COVID.OP.PRO   | Oropharyngeal swab    | PRO | CORE0203 | V1 | COVID     | Human | None | No | 28.52  | 53.54 | 1.9  |
| CORE0203.V2.COVID.ETA.PRO  | Endotracheal aspirate | PRO | CORE0203 | V2 | COVID     | Human | None | No | None   | 30.15 | 3.3  |
| CORE0203.V2.COVID.NP.PRO   | Nasopharyngeal swab   | PRO | CORE0203 | V2 | COVID     | Human | None | No | 84.66  | 34.39 | 2.9  |
| CORE0203.V2.COVID.OP.PRO   | Oropharyngeal swab    | PRO | CORE0203 | V2 | COVID     | Human | None | No | 22.06  | 43.39 | 2.3  |
| CORE0203.V3.COVID.ETA.PRO  | Endotracheal aspirate | PRO | CORE0203 | V3 | COVID     | Human | None | No | None   | 27.86 | 3.6  |
| CORE0203.V3.COVID.NP.PRO   | Nasopharyngeal swab   | PRO | CORE0203 | V3 | COVID     | Human | None | No | 7.01   | 38.23 | 2.6  |
| CORE0203.V3.COVID.OP.PRO   | Oropharyngeal swab    | PRO | CORE0203 | V3 | COVID     | Human | None | No | 58.79  | 42.76 | 2.3  |
| CORE0203.V4.COVID.ETA.PRO  | Endotracheal aspirate | PRO | CORE0203 | V4 | COVID     | Human | None | No | None   | 13.72 | 7.3  |
| CORE0203.V4.COVID.NP.PRO   | Nasopharyngeal swab   | PRO | CORE0203 | V4 | COVID     | Human | None | No | 75.84  | 20.38 | 4.9  |
| CORE0203.V4.COVID.OP.PRO   | Oropharyngeal swab    | PRO | CORE0203 | V4 | COVID     | Human | None | No | 18.59  | 44    | 2.3  |
| CORE0203.V5.COVID.NP.PRO   | Nasopharyngeal swab   | PRO | CORE0203 | V5 | COVID     | Human | None | No | 82.54  | 30.79 | 3.3  |
| CORE0203.V5.COVID.OP.PRO   | Oropharyngeal swab    | PRO | CORE0203 | V5 | COVID     | Human | None | No | 16.85  | 48.71 | 2.1  |
| CORE0210.V1.COVID.ETA.PRO  | Endotracheal aspirate | PRO | CORE0210 | V1 | COVID     | Human | None | No | None   | 13.76 | 7.3  |
| CORE0210.V1.COVID.NP.PRO   | Nasopharyngeal swab   | PRO | CORE0210 | V1 | COVID     | Human | None | No | 70.74  | 61.64 | 1.6  |
| CORE0210.V1.COVID.OP.PRO   | Oropharyngeal swab    | PRO | CORE0210 | V1 | COVID     | Human | None | No | 24.98  | 53.71 | 1.9  |
| CORE0210.V2.COVID.NP.PRO   | Nasopharyngeal swab   | PRO | CORE0210 | V2 | COVID     | Human | None | No | 72.69  | 76.87 | 1.5  |
| CORE0210.V2.COVID.OP.PRO   | Oropharyngeal swab    | PRO | CORE0210 | V2 | COVID     | Human | None | No | 75.03  | 75.88 | 1.5  |
| CORE0210.V3.COVID.ETA.PRO  | Endotracheal aspirate | PRO | CORE0210 | V3 | COVID     | Human | None | No | None   | 11.48 | 8.7  |
| CORE0210.V3.COVID.NP.PRO   | Nasopharyngeal swab   | PRO | CORE0210 | V3 | COVID     | Human | None | No | 95.12  | 49.31 | 2    |
| CORE0210.V3.COVID.OP.PRO   | Oropharyngeal swab    | PRO | CORE0210 | V3 | COVID     | Human | None | No | 95.03  | 66.7  | 1.5  |
| CORE0210.V4.COVID.NP.PRO   | Nasopharyngeal swab   | PRO | CORE0210 | V4 | COVID     | Human | None | No | 31.21  | 84.53 | 1.5  |
| CORE0210.V4.COVID.OP.PRO   | Oropharyngeal swab    | PRO | CORE0210 | V4 | COVID     | Human | None | No | 75.42  | 64.47 | 1.6  |
| CORE0210.V5.COVID.ETA.PRO  | Endotracheal aspirate | PRO | CORE0210 | V5 | COVID     | Human | None | No | None   | 26.59 | 3.8  |
| CORE0210.V5.COVID.NP.PRO   | Nasopharyngeal swab   | PRO | CORE0210 | V5 | COVID     | Human | None | No | 70.63  | 63.26 | 1.6  |
| CORE0210.V5.COVID.OP.PRO   | Oropharyngeal swab    | PRO | CORE0210 | V5 | COVID     | Human | None | No | 34.27  | 71.55 | 1.5  |
| CORE0211.V1.COVID.NP.PRO   | Nasopharyngeal swab   | PRO | CORE0211 | V1 | COVID     | Human | None | No | 35.69  | 3.52  | 28.4 |
| CORE0211.V1.COVID.OP.PRO   | Oropharyngeal swab    | PRO | CORE0211 | V1 | COVID     | Human | None | No | 103.65 | 66.91 | 1.5  |
| CORE0211.V2.COVID.ETA.PRO  | Endotracheal aspirate | PRO | CORE0211 | V2 | COVID     | Human | None | No | 54.85  | 11.78 | 8.5  |
| CORE0211.V2.COVID.OP.PRO   | Oropharyngeal swab    | PRO | CORE0211 | V2 | COVID     | Human | None | No | 112.61 | 72.47 | 1.5  |
| CORE0212.V1.COVID.NP.PRO   | Nasopharyngeal swab   | PRO | CORE0212 | V1 | COVID     | Human | None | No | 19.61  | 37.89 | 2.6  |
| CORE0212.V1.COVID.OP.PRO   | Oropharyngeal swab    | PRO | CORE0212 | V1 | COVID     | Human | None | No | 45.22  | 58.38 | 1.7  |
| CORE0212.V2.COVID.NP.PRO   | Nasopharyngeal swab   | PRO | CORE0212 | V2 | COVID     | Human | None | No | 41.1   | 3.35  | 29.9 |
| CORE0212.V2.COVID.OP.PRO   | Oropharyngeal swab    | PRO | CORE0212 | V2 | COVID     | Human | None | No | 8.31   | 1.63  | 38   |
| CORE0212.V3.COVID.NP.PRO   | Nasopharyngeal swab   | PRO | CORE0212 | V3 | COVID     | Human | None | No | 1.71   | 0.63  | 38   |
| CORE0212.V3.COVID.OP.PRO   | Oropharyngeal swab    | PRO | CORE0212 | V3 | COVID     | Human | None | No | 6.06   | 4.41  | 22.7 |
| CORE0212.V4.COVID.ETA.PRO  | Endotracheal aspirate | PRO | CORE0212 | V4 | COVID     | Human | None | No | 16.24  | 0.6   | 38   |
| CORE0212.V4.COVID.NP.PRO   | Nasopharyngeal swab   | PRO | CORE0212 | V4 | COVID     | Human | None | No | 0.01   | 0.24  | 38   |
| CORE0212.V4.COVID.OP.PRO   | Oropharyngeal swab    | PRO | CORE0212 | V4 | COVID     | Human | None | No | 0.04   | 0.29  | 38   |
| CORE0212.V5.COVID.ETA.PRO  | Endotracheal aspirate | PRO | CORE0212 | V5 | COVID     | Human | None | No | 39.87  | 1.29  | 38   |
| CORE0212.V5.COVID.NP.PRO   | Nasopharyngeal swab   | PRO | CORE0212 | V5 | COVID     | Human | None | No | 1.08   | 0.7   | 38   |
| CORE0212.V5.COVID.OP.PRO   | Oropharyngeal swab    | PRO | CORE0212 | V5 | COVID     | Human | None | No | -0.01  | 0.21  | 38   |
| CORE0212.V6.COVID.ETA.PRO  | Endotracheal aspirate | PRO | CORE0212 | V6 | COVID     | Human | None | No | 2.21   | 0.55  | 38   |
| CORE0212.V6.COVID.NP.PRO   | Nasopharyngeal swab   | PRO | CORE0212 | V6 | COVID     | Human | None | No | 2.75   | 2.73  | 36.6 |
| CORE0212.V6.COVID.OP.PRO   | Oropharyngeal swab    | PRO | CORE0212 | V6 | COVID     | Human | None | No | 6.46   | 3.54  | 28.3 |
| CORE0215.V1.COVID.NP.PRO   | Nasopharyngeal swab   | PRO | CORE0215 | V1 | COVID     | Human | None | No | 60.79  | 34.12 | 2.9  |
| CORE0215.V1.COVID.OP.PRO   | Oropharyngeal swab    | PRO | CORE0215 | V1 | COVID     | Human | None | No | 1.27   | 67.47 | 1.5  |
| CORE0221.V1.COVID.NP.PRO   | Nasopharyngeal swab   | PRO | CORE0221 | V1 | COVID     | Human | None | No | 78.77  | 34.49 | 2.9  |
| CORE0221.V1.COVID.OP.PRO   | Oropharyngeal swab    | PRO | CORE0221 | V1 | COVID     | Human | None | No | 73.45  | 66.72 | 1.5  |
| CORE0221.V2.COVID.NP.PRO   | Nasopharyngeal swab   | PRO | CORE0221 | V2 | COVID     | Human | None | No | 72.01  | 37.79 | 2.7  |
| CORE0221.V2.COVID.OP.PRO   | Oropharyngeal swab    | PRO | CORE0221 | V2 | COVID     | Human | None | No | 9.54   | 77.32 | 1.5  |

|                           |                       |     |          |    |       |       |      |    |        |        |      |
|---------------------------|-----------------------|-----|----------|----|-------|-------|------|----|--------|--------|------|
| CORE0222.V1.COVID.NP.PRO  | Nasopharyngeal swab   | PRO | CORE0222 | V1 | COVID | Human | None | No | None   | 26.61  | 3.8  |
| CORE0222.V1.COVID.OP.PRO  | Oropharyngeal swab    | PRO | CORE0222 | V1 | COVID | Human | None | No | None   | 71.71  | 1.5  |
| CORE0222.V2.COVID.NP.PRO  | Nasopharyngeal swab   | PRO | CORE0222 | V2 | COVID | Human | None | No | None   | 19.61  | 5.1  |
| CORE0222.V2.COVID.OP.PRO  | Oropharyngeal swab    | PRO | CORE0222 | V2 | COVID | Human | None | No | None   | 64.62  | 1.6  |
| CORE0222.V3.COVID.NP.PRO  | Nasopharyngeal swab   | PRO | CORE0222 | V3 | COVID | Human | None | No | None   | 40.19  | 2.5  |
| CORE0222.V3.COVID.OP.PRO  | Oropharyngeal swab    | PRO | CORE0222 | V3 | COVID | Human | None | No | None   | 65.6   | 1.5  |
| CORE0222.V4.COVID.NP.PRO  | Nasopharyngeal swab   | PRO | CORE0222 | V4 | COVID | Human | None | No | None   | 60.98  | 1.6  |
| CORE0222.V4.COVID.OP.PRO  | Oropharyngeal swab    | PRO | CORE0222 | V4 | COVID | Human | None | No | None   | 62.87  | 1.6  |
| CORE0225.V1.COVID.ETA.PRO | Endotracheal aspirate | PRO | CORE0225 | V1 | COVID | Human | None | No | 1.26   | 46.27  | 2.2  |
| CORE0225.V1.COVID.NP.PRO  | Nasopharyngeal swab   | PRO | CORE0225 | V1 | COVID | Human | None | No | None   | 43.64  | 2.3  |
| CORE0225.V1.COVID.OP.PRO  | Oropharyngeal swab    | PRO | CORE0225 | V1 | COVID | Human | None | No | None   | 68.6   | 1.5  |
| CORE0225.V2.COVID.NP.PRO  | Nasopharyngeal swab   | PRO | CORE0225 | V2 | COVID | Human | None | No | None   | 53.27  | 1.9  |
| CORE0225.V2.COVID.OP.PRO  | Oropharyngeal swab    | PRO | CORE0225 | V2 | COVID | Human | None | No | None   | 61.53  | 1.6  |
| CORE0225.V3.COVID.NP.PRO  | Nasopharyngeal swab   | PRO | CORE0225 | V3 | COVID | Human | None | No | None   | 62.25  | 1.6  |
| CORE0225.V3.COVID.OP.PRO  | Oropharyngeal swab    | PRO | CORE0225 | V3 | COVID | Human | None | No | None   | 77.9   | 1.5  |
| CORE0225.V4.COVID.ETA.PRO | Endotracheal aspirate | PRO | CORE0225 | V4 | COVID | Human | None | No | 73.86  | 37.41  | 2.7  |
| CORE0225.V4.COVID.NP.PRO  | Nasopharyngeal swab   | PRO | CORE0225 | V4 | COVID | Human | None | No | None   | 52.29  | 1.9  |
| CORE0225.V4.COVID.OP.PRO  | Oropharyngeal swab    | PRO | CORE0225 | V4 | COVID | Human | None | No | None   | 78.59  | 1.5  |
| CORE0225.V5.COVID.NP.PRO  | Nasopharyngeal swab   | PRO | CORE0225 | V5 | COVID | Human | None | No | None   | 80.81  | 1.5  |
| CORE0225.V5.COVID.OP.PRO  | Oropharyngeal swab    | PRO | CORE0225 | V5 | COVID | Human | None | No | None   | 79.41  | 1.5  |
| CORE0225.V6.COVID.NP.PRO  | Nasopharyngeal swab   | PRO | CORE0225 | V6 | COVID | Human | None | No | None   | 53.06  | 1.9  |
| CORE0225.V6.COVID.OP.PRO  | Oropharyngeal swab    | PRO | CORE0225 | V6 | COVID | Human | None | No | None   | 73.17  | 1.5  |
| CORE0226.V1.COVID.NP.PRO  | Nasopharyngeal swab   | PRO | CORE0226 | V1 | COVID | Human | None | No | None   | 49.65  | 2    |
| CORE0226.V1.COVID.OP.PRO  | Oropharyngeal swab    | PRO | CORE0226 | V1 | COVID | Human | None | No | None   | 75.21  | 1.5  |
| CORE0227.V1.COVID.NP.PRO  | Nasopharyngeal swab   | PRO | CORE0227 | V1 | COVID | Human | None | No | None   | 71.3   | 1.5  |
| CORE0227.V1.COVID.OP.PRO  | Oropharyngeal swab    | PRO | CORE0227 | V1 | COVID | Human | None | No | None   | 73.68  | 1.5  |
| CORE0227.V2.COVID.NP.PRO  | Nasopharyngeal swab   | PRO | CORE0227 | V2 | COVID | Human | None | No | None   | 45.48  | 2.2  |
| CORE0227.V2.COVID.OP.PRO  | Oropharyngeal swab    | PRO | CORE0227 | V2 | COVID | Human | None | No | None   | 73.72  | 1.5  |
| CORE0228.V1.COVID.NP.PRO  | Nasopharyngeal swab   | PRO | CORE0228 | V1 | COVID | Human | None | No | None   | 43.67  | 2.3  |
| CORE0228.V1.COVID.OP.PRO  | Oropharyngeal swab    | PRO | CORE0228 | V1 | COVID | Human | None | No | None   | 77.57  | 1.5  |
| CORE0228.V2.COVID.NP.PRO  | Nasopharyngeal swab   | PRO | CORE0228 | V2 | COVID | Human | None | No | None   | 53.48  | 1.9  |
| CORE0228.V2.COVID.OP.PRO  | Oropharyngeal swab    | PRO | CORE0228 | V2 | COVID | Human | None | No | None   | 104.41 | 1.5  |
| CORE0228.V3.COVID.NP.PRO  | Nasopharyngeal swab   | PRO | CORE0228 | V3 | COVID | Human | None | No | None   | 14.56  | 6.9  |
| CORE0228.V3.COVID.OP.PRO  | Oropharyngeal swab    | PRO | CORE0228 | V3 | COVID | Human | None | No | None   | 50.8   | 2    |
| CORE0228.V4.COVID.NP.PRO  | Nasopharyngeal swab   | PRO | CORE0228 | V4 | COVID | Human | None | No | None   | 70.32  | 1.5  |
| CORE0228.V4.COVID.OP.PRO  | Oropharyngeal swab    | PRO | CORE0228 | V4 | COVID | Human | None | No | None   | 79.66  | 1.5  |
| CORE0228.V5.COVID.NP.PRO  | Nasopharyngeal swab   | PRO | CORE0228 | V5 | COVID | Human | None | No | None   | 49.14  | 2    |
| CORE0228.V5.COVID.OP.PRO  | Oropharyngeal swab    | PRO | CORE0228 | V5 | COVID | Human | None | No | None   | 83.23  | 1.5  |
| CORE0230.V1.COVID.NP.PRO  | Nasopharyngeal swab   | PRO | CORE0230 | V1 | COVID | Human | None | No | None   | 29.45  | 3.4  |
| CORE0230.V1.COVID.OP.PRO  | Oropharyngeal swab    | PRO | CORE0230 | V1 | COVID | Human | None | No | None   | 81.88  | 1.5  |
| CORE0230.V2.COVID.NP.PRO  | Nasopharyngeal swab   | PRO | CORE0230 | V2 | COVID | Human | None | No | None   | 2.57   | 38   |
| CORE0230.V2.COVID.OP.PRO  | Oropharyngeal swab    | PRO | CORE0230 | V2 | COVID | Human | None | No | None   | 64.5   | 1.6  |
| CORE0236.V1.COVID.ETA.PRO | Endotracheal aspirate | PRO | CORE0236 | V1 | COVID | Human | None | No | 49.84  | 29.18  | 3.4  |
| CORE0236.V1.COVID.NP.PRO  | Nasopharyngeal swab   | PRO | CORE0236 | V1 | COVID | Human | None | No | None   | 50.17  | 2    |
| CORE0236.V1.COVID.OP.PRO  | Oropharyngeal swab    | PRO | CORE0236 | V1 | COVID | Human | None | No | None   | 79.99  | 1.5  |
| CORE0239.V1.COVID.NP.PRO  | Nasopharyngeal swab   | PRO | CORE0239 | V1 | COVID | Human | None | No | None   | 9.02   | 11.1 |
| CORE0239.V1.COVID.OP.PRO  | Oropharyngeal swab    | PRO | CORE0239 | V1 | COVID | Human | None | No | None   | 46.01  | 2.2  |
| CORE0242.V1.COVID.NP.PRO  | Nasopharyngeal swab   | PRO | CORE0242 | V1 | COVID | Human | None | No | None   | 30.32  | 3.3  |
| CORE0242.V1.COVID.OP.PRO  | Oropharyngeal swab    | PRO | CORE0242 | V1 | COVID | Human | None | No | None   | 45.85  | 2.2  |
| CORE0242.V2.COVID.NP.PRO  | Nasopharyngeal swab   | PRO | CORE0242 | V2 | COVID | Human | None | No | None   | 12.85  | 7.8  |
| CORE0242.V2.COVID.OP.PRO  | Oropharyngeal swab    | PRO | CORE0242 | V2 | COVID | Human | None | No | None   | 13.59  | 7.4  |
| CORE0242.V3.COVID.NP.PRO  | Nasopharyngeal swab   | PRO | CORE0242 | V3 | COVID | Human | None | No | None   | 4.53   | 22.1 |
| CORE0242.V3.COVID.OP.PRO  | Oropharyngeal swab    | PRO | CORE0242 | V3 | COVID | Human | None | No | None   | 60.44  | 1.7  |
| CORE0242.V4.COVID.ETA.PRO | Endotracheal aspirate | PRO | CORE0242 | V4 | COVID | Human | None | No | 37.89  | 3.28   | 30.5 |
| CORE0242.V4.COVID.NP.PRO  | Nasopharyngeal swab   | PRO | CORE0242 | V4 | COVID | Human | None | No | None   | 19.38  | 5.2  |
| CORE0242.V4.COVID.OP.PRO  | Oropharyngeal swab    | PRO | CORE0242 | V4 | COVID | Human | None | No | None   | 50.04  | 2    |
| CORE0242.V5.COVID.ETA.PRO | Endotracheal aspirate | PRO | CORE0242 | V5 | COVID | Human | None | No | 129.02 | 16.29  | 6.1  |
| CORE0242.V5.COVID.NP.PRO  | Nasopharyngeal swab   | PRO | CORE0242 | V5 | COVID | Human | None | No | None   | 60.33  | 1.7  |
| CORE0242.V5.COVID.OP.PRO  | Oropharyngeal swab    | PRO | CORE0242 | V5 | COVID | Human | None | No | None   | 54.8   | 1.8  |
| CORE0242.V6.COVID.NP.PRO  | Nasopharyngeal swab   | PRO | CORE0242 | V6 | COVID | Human | None | No | None   | 41.1   | 2.4  |
| CORE0242.V6.COVID.OP.PRO  | Oropharyngeal swab    | PRO | CORE0242 | V6 | COVID | Human | None | No | None   | 48.44  | 2.1  |
| CORE0244.V1.COVID.NP.PRO  | Nasopharyngeal swab   | PRO | CORE0244 | V1 | COVID | Human | None | No | None   | 62.6   | 1.6  |
| CORE0244.V1.COVID.OP.PRO  | Oropharyngeal swab    | PRO | CORE0244 | V1 | COVID | Human | None | No | None   | 64.72  | 1.6  |
| CORE0245.V1.COVID.NP.PRO  | Nasopharyngeal swab   | PRO | CORE0245 | V1 | COVID | Human | None | No | None   | 0.7    | 38   |
| CORE0245.V1.COVID.OP.PRO  | Oropharyngeal swab    | PRO | CORE0245 | V1 | COVID | Human | None | No | None   | 72.33  | 1.5  |
| CORE0245.V2.COVID.NP.PRO  | Nasopharyngeal swab   | PRO | CORE0245 | V2 | COVID | Human | None | No | None   | 25.71  | 3.9  |
| CORE0245.V2.COVID.OP.PRO  | Oropharyngeal swab    | PRO | CORE0245 | V2 | COVID | Human | None | No | None   | 61.12  | 1.6  |
| CORE0247.V1.COVID.NP.PRO  | Nasopharyngeal swab   | PRO | CORE0247 | V1 | COVID | Human | None | No | None   | 55.63  | 1.8  |
| CORE0247.V1.COVID.OP.PRO  | Oropharyngeal swab    | PRO | CORE0247 | V1 | COVID | Human | None | No | None   | 0.13   | 38   |
| CORE0253.V1.COVID.NP.PRO  | Nasopharyngeal swab   | PRO | CORE0253 | V1 | COVID | Human | None | No | None   | 40.74  | 2.5  |
| CORE0253.V1.COVID.OP.PRO  | Oropharyngeal swab    | PRO | CORE0253 | V1 | COVID | Human | None | No | None   | 57.85  | 1.7  |
| CORE0255.V1.COVID.NP.PRO  | Nasopharyngeal swab   | PRO | CORE0255 | V1 | COVID | Human | None | No | None   | 33.05  | 3    |
| CORE0255.V1.COVID.OP.PRO  | Oropharyngeal swab    | PRO | CORE0255 | V1 | COVID | Human | None | No | None   | 52.64  | 1.9  |
| CORE0255.V2.COVID.NP.PRO  | Nasopharyngeal swab   | PRO | CORE0255 | V2 | COVID | Human | None | No | None   | 52.89  | 1.9  |
| CORE0255.V2.COVID.OP.PRO  | Oropharyngeal swab    | PRO | CORE0255 | V2 | COVID | Human | None | No | None   | 28.83  | 3.5  |
| CORE0255.V3.COVID.ETA.PRO | Endotracheal aspirate | PRO | CORE0255 | V3 | COVID | Human | None | No | 108.44 | 11.74  | 8.5  |
| CORE0255.V3.COVID.NP.PRO  | Nasopharyngeal swab   | PRO | CORE0255 | V3 | COVID | Human | None | No | None   | 35.79  | 2.8  |
| CORE0255.V3.COVID.OP.PRO  | Oropharyngeal swab    | PRO | CORE0255 | V3 | COVID | Human | None | No | None   | 70.35  | 1.5  |
| CORE0255.V4.COVID.NP.PRO  | Nasopharyngeal swab   | PRO | CORE0255 | V4 | COVID | Human | None | No | None   | 66.85  | 1.5  |
| CORE0255.V4.COVID.OP.PRO  | Oropharyngeal swab    | PRO | CORE0255 | V4 | COVID | Human | None | No | None   | 44.19  | 2.3  |
| CORE0255.V5.COVID.ETA.PRO | Endotracheal aspirate | PRO | CORE0255 | V5 | COVID | Human | None | No | 52.9   | 28.79  | 3.5  |
| CORE0255.V5.COVID.NP.PRO  | Nasopharyngeal swab   | PRO | CORE0255 | V5 | COVID | Human | None | No | None   | 52.93  | 1.9  |
| CORE0255.V5.COVID.OP.PRO  | Oropharyngeal swab    | PRO | CORE0255 | V5 | COVID | Human | None | No | None   | 48.84  | 2.1  |
| CORE0255.V6.COVID.ETA.PRO | Endotracheal aspirate | PRO | CORE0255 | V6 | COVID | Human | None | No | 122.61 | 11.3   | 8.9  |
| CORE0255.V6.COVID.NP.PRO  | Nasopharyngeal swab   | PRO | CORE0255 | V6 | COVID | Human | None | No | None   | 48.6   | 2.1  |
| CORE0255.V6.COVID.OP.PRO  | Oropharyngeal swab    | PRO | CORE0255 | V6 | COVID | Human | None | No | None   | 45.78  | 2.2  |
| CORE0255.V7.COVID.NP.PRO  | Nasopharyngeal swab   | PRO | CORE0255 | V7 | COVID | Human | None | No | None   | 75.29  | 1.5  |
| CORE0255.V7.COVID.OP.PRO  | Oropharyngeal swab    | PRO | CORE0255 | V7 | COVID | Human | None | No | None   | 70.34  | 1.5  |
| CORE0256.V1.COVID.ETA.PRO | Endotracheal aspirate | PRO | CORE0256 | V1 | COVID | Human | None | No | 18.89  | 21.33  | 4.7  |
| CORE0256.V1.COVID.NP.PRO  | Nasopharyngeal swab   | PRO | CORE0256 | V1 | COVID | Human | None | No | None   | 17.42  | 5.7  |
| CORE0256.V1.COVID.OP.PRO  | Oropharyngeal swab    | PRO | CORE0256 | V1 | COVID | Human | None | No | None   | 18.49  | 5.4  |
| CORE0256.V2.COVID.ETA.PRO | Endotracheal aspirate | PRO | CORE0256 | V2 | COVID | Human | None | No | 45.09  | 18.98  | 5.3  |
| CORE0256.V2.COVID.NP.PRO  | Nasopharyngeal swab   | PRO | CORE0256 | V2 | COVID | Human | None | No | None   | 0.08   | 38   |
| CORE0256.V2.COVID.OP.PRO  | Oropharyngeal swab    | PRO | CORE0256 | V2 | COVID | Human | None | No | None   | 46.12  | 2.2  |
| CORE0257.V1.COVID.NP.PRO  | Nasopharyngeal swab   | PRO | CORE0257 | V1 | COVID | Human | None | No | None   | 39.08  | 2.6  |
| CORE0257.V1.COVID.OP.PRO  | Oropharyngeal swab    | PRO | CORE0257 | V1 | COVID | Human | None | No | None   | 53.02  | 1.9  |
| CORE0257.V2.COVID.NP.PRO  | Nasopharyngeal swab   | PRO | CORE0257 | V2 | COVID | Human | None | No | None   | 24.33  | 4.1  |
| CORE0257.V2.COVID.OP.PRO  | Oropharyngeal swab    | PRO | CORE0257 | V2 | COVID | Human | None | No | None   | 59.49  | 1.7  |
| CORE0257.V3.COVID.NP.PRO  | Nasopharyngeal swab   | PRO | CORE0257 | V3 | COVID | Human | None | No | None   | 45.59  | 2.2  |
| CORE0257.V3.COVID.OP.PRO  | Oropharyngeal swab    | PRO | CORE0257 | V3 | COVID | Human | None | No | None   | 62.37  | 1.6  |
| CORE0258.V1.COVID.NP.PRO  | Nasopharyngeal swab   | PRO | CORE0258 | V1 | COVID | Human | None | No | None   | 15.34  | 6.5  |
| CORE0258.V1.COVID.OP.PRO  | Oropharyngeal swab    | PRO | CORE0258 | V1 | COVID | Human | None | No | None   | 38.04  | 2.6  |
| CORE0259.V2.COVID.NP.PRO  | Nasopharyngeal swab   | PRO | CORE0259 | V2 | COVID | Human | None | No | None   | 4.52   | 22.1 |
| CORE0259.V2.COVID.OP.PRO  | Oropharyngeal swab    | PRO | CORE0259 | V2 | COVID | Human | None | No | None   | 46.68  | 2.1  |
| CORE0271.V1.COVID.NP.PRO  | Nasopharyngeal swab   | PRO | CORE0271 | V1 | COVID | Human | None | No | None   | 1.03   | 36   |
| CORE0271.V1.COVID.OP.PRO  | Oropharyngeal swab    | PRO | CORE0271 | V1 | COVID | Human | None | No | None   | 2.01   | 36   |
| CORE0285.V1.COVID.NP.PRO  | Nasopharyngeal swab   | PRO | CORE0285 | V1 | COVID | Human | None | No | None   | 51.05  | 2    |

|                             |                       |     |          |    |           |       |      |    |        |       |      |
|-----------------------------|-----------------------|-----|----------|----|-----------|-------|------|----|--------|-------|------|
| CORE0285.V1.COVID.OP.PRO    | Oropharyngeal swab    | PRO | CORE0285 | V1 | COVID     | Human | None | No | None   | 99.57 | 1.5  |
| CORE0285.V2.COVID.NP.PRO    | Nasopharyngeal swab   | PRO | CORE0285 | V2 | COVID     | Human | None | No | None   | 40.9  | 2.4  |
| CORE0285.V2.COVID.OP.PRO    | Oropharyngeal swab    | PRO | CORE0285 | V2 | COVID     | Human | None | No | None   | 65.02 | 1.5  |
| CORE0285.V3.COVID.NP.PRO    | Nasopharyngeal swab   | PRO | CORE0285 | V3 | COVID     | Human | None | No | None   | 0.75  | 38   |
| CORE0285.V3.COVID.OP.PRO    | Oropharyngeal swab    | PRO | CORE0285 | V3 | COVID     | Human | None | No | None   | 3.38  | 29.6 |
| CORE0285.V4.COVID.NP.PRO    | Nasopharyngeal swab   | PRO | CORE0285 | V4 | COVID     | Human | None | No | None   | 23.87 | 4.2  |
| CORE0285.V4.COVID.OP.PRO    | Oropharyngeal swab    | PRO | CORE0285 | V4 | COVID     | Human | None | No | None   | 9.71  | 10.3 |
| CORE0288.V1.COVID.NP.PRO    | Nasopharyngeal swab   | PRO | CORE0288 | V1 | COVID     | Human | None | No | None   | 63.34 | 1.6  |
| CORE0288.V1.COVID.OP.PRO    | Oropharyngeal swab    | PRO | CORE0288 | V1 | COVID     | Human | None | No | None   | 90.47 | 1.5  |
| CORE0288.V2.COVID.NP.PRO    | Nasopharyngeal swab   | PRO | CORE0288 | V2 | COVID     | Human | None | No | None   | 25.1  | 4    |
| CORE0288.V2.COVID.OP.PRO    | Oropharyngeal swab    | PRO | CORE0288 | V2 | COVID     | Human | None | No | None   | 37.14 | 2.7  |
| CORE0288.V3.COVID.ETA.PRO   | Endotracheal aspirate | PRO | CORE0288 | V3 | COVID     | Human | None | No | 122.49 | 24.54 | 4.1  |
| CORE0288.V3.COVID.NP.PRO    | Nasopharyngeal swab   | PRO | CORE0288 | V3 | COVID     | Human | None | No | None   | 30.25 | 3.3  |
| CORE0288.V3.COVID.OP.PRO    | Oropharyngeal swab    | PRO | CORE0288 | V3 | COVID     | Human | None | No | None   | 55.62 | 1.8  |
| CORE0288.V4.COVID.ETA.PRO   | Endotracheal aspirate | PRO | CORE0288 | V4 | COVID     | Human | None | No | 83.18  | 26.36 | 3.8  |
| CORE0288.V4.COVID.NP.PRO    | Nasopharyngeal swab   | PRO | CORE0288 | V4 | COVID     | Human | None | No | None   | 64.92 | 1.5  |
| CORE0288.V4.COVID.OP.PRO    | Oropharyngeal swab    | PRO | CORE0288 | V4 | COVID     | Human | None | No | None   | 78.22 | 1.5  |
| CORE0288.V5.COVID.ETA.PRO   | Endotracheal aspirate | PRO | CORE0288 | V5 | COVID     | Human | None | No | 151.43 | 13.57 | 7.4  |
| CORE0288.V5.COVID.NP.PRO    | Nasopharyngeal swab   | PRO | CORE0288 | V5 | COVID     | Human | None | No | None   | 75.23 | 1.5  |
| CORE0288.V5.COVID.OP.PRO    | Oropharyngeal swab    | PRO | CORE0288 | V5 | COVID     | Human | None | No | None   | 81.75 | 1.5  |
| CORE0288.V6.COVID.NP.PRO    | Nasopharyngeal swab   | PRO | CORE0288 | V6 | COVID     | Human | None | No | None   | 2.55  | 38   |
| CORE0288.V6.COVID.OP.PRO    | Oropharyngeal swab    | PRO | CORE0288 | V6 | COVID     | Human | None | No | None   | 0.78  | 38   |
| CORE0288.V7.COVID.NP.PRO    | Nasopharyngeal swab   | PRO | CORE0288 | V7 | COVID     | Human | None | No | None   | 0.79  | 38   |
| CORE0288.V7.COVID.OP.PRO    | Oropharyngeal swab    | PRO | CORE0288 | V7 | COVID     | Human | None | No | None   | 0.66  | 38   |
| CORE0288.V8.COVID.NP.PRO    | Nasopharyngeal swab   | PRO | CORE0288 | V8 | COVID     | Human | None | No | None   | 51.93 | 1.9  |
| CORE0288.V8.COVID.OP.PRO    | Oropharyngeal swab    | PRO | CORE0288 | V8 | COVID     | Human | None | No | None   | 62.24 | 1.6  |
| CORE0288.V9.COVID.NP.PRO    | Nasopharyngeal swab   | PRO | CORE0288 | V9 | COVID     | Human | None | No | None   | 23.55 | 4.3  |
| CORE0288.V9.COVID.OP.PRO    | Oropharyngeal swab    | PRO | CORE0288 | V9 | COVID     | Human | None | No | None   | 0.63  | 38   |
| CORE0290.V1.COVID.NP.PRO    | Nasopharyngeal swab   | PRO | CORE0290 | V1 | COVID     | Human | None | No | None   | 76.78 | 1.5  |
| CORE0290.V1.COVID.OP.PRO    | Oropharyngeal swab    | PRO | CORE0290 | V1 | COVID     | Human | None | No | None   | 61.89 | 1.6  |
| CORE0290.V2.COVID.NP.PRO    | Nasopharyngeal swab   | PRO | CORE0290 | V2 | COVID     | Human | None | No | None   | 40.37 | 2.5  |
| CORE0290.V2.COVID.OP.PRO    | Oropharyngeal swab    | PRO | CORE0290 | V2 | COVID     | Human | None | No | None   | 75.64 | 1.5  |
| CORE0291.V1.COVID.NP.PRO    | Nasopharyngeal swab   | PRO | CORE0291 | V1 | COVID     | Human | None | No | None   | 77.11 | 1.5  |
| CORE0291.V1.COVID.OP.PRO    | Oropharyngeal swab    | PRO | CORE0291 | V1 | COVID     | Human | None | No | None   | 83.14 | 1.5  |
| CORE0293.V1.COVID.NP.PRO    | Nasopharyngeal swab   | PRO | CORE0293 | V1 | COVID     | Human | None | No | None   | 35.95 | 2.8  |
| CORE0293.V1.COVID.OP.PRO    | Oropharyngeal swab    | PRO | CORE0293 | V1 | COVID     | Human | None | No | None   | 65.47 | 1.5  |
| CORE0297.V1.COVID.NP.PRO    | Nasopharyngeal swab   | PRO | CORE0297 | V1 | COVID     | Human | None | No | None   | 0.46  | 38   |
| CORE0297.V1.COVID.OP.PRO    | Oropharyngeal swab    | PRO | CORE0297 | V1 | COVID     | Human | None | No | None   | 0.16  | 38   |
| CORE0298.V1.COVID.NP.PRO    | Nasopharyngeal swab   | PRO | CORE0298 | V1 | COVID     | Human | None | No | None   | 0.25  | 38   |
| CORE0298.V1.COVID.OP.PRO    | Oropharyngeal swab    | PRO | CORE0298 | V1 | COVID     | Human | None | No | None   | 0.21  | 38   |
| CORE0298.V2.COVID.NP.PRO    | Nasopharyngeal swab   | PRO | CORE0298 | V2 | COVID     | Human | None | No | None   | 6.09  | 16.4 |
| CORE0298.V2.COVID.OP.PRO    | Oropharyngeal swab    | PRO | CORE0298 | V2 | COVID     | Human | None | No | None   | 53.02 | 1.9  |
| CORE0205.V1.COVID.NP.PRO    | Nasopharyngeal swab   | PRO | CORE0205 | V1 | COVID     | Human | None | No | 14.94  | 60.94 | 1.6  |
| CORE0205.V1.COVID.OP.PRO    | Oropharyngeal swab    | PRO | CORE0205 | V1 | COVID     | Human | None | No | 0.79   | 78.04 | 1.5  |
| CORE0205.V2.COVID.NP.PRO    | Nasopharyngeal swab   | PRO | CORE0205 | V2 | COVID     | Human | None | No | 34.5   | 57.06 | 1.8  |
| CORE0205.V2.COVID.OP.PRO    | Oropharyngeal swab    | PRO | CORE0205 | V2 | COVID     | Human | None | No | 49.7   | 66.95 | 1.5  |
| CORE0205.V3.COVID.NP.PRO    | Nasopharyngeal swab   | PRO | CORE0205 | V3 | COVID     | Human | None | No | 93.96  | 27.38 | 3.7  |
| CORE0205.V3.COVID.OP.PRO    | Oropharyngeal swab    | PRO | CORE0205 | V3 | COVID     | Human | None | No | 182.27 | 48.57 | 2.1  |
| CORE0218.V1.COVID.ETA.PRO   | Endotracheal aspirate | PRO | CORE0218 | V1 | COVID     | Human | None | No | 31.18  | 19.21 | 5.2  |
| CORE0218.V1.COVID.NP.PRO    | Nasopharyngeal swab   | PRO | CORE0218 | V1 | COVID     | Human | None | No | 70.67  | 60.66 | 1.7  |
| CORE0218.V1.COVID.OP.PRO    | Oropharyngeal swab    | PRO | CORE0218 | V1 | COVID     | Human | None | No | 22.4   | 76.98 | 1.5  |
| CORE0218.V2.COVID.ETA.PRO   | Endotracheal aspirate | PRO | CORE0218 | V2 | COVID     | Human | None | No | 99.79  | 13.28 | 7.5  |
| CORE0218.V2.COVID.NP.PRO    | Nasopharyngeal swab   | PRO | CORE0218 | V2 | COVID     | Human | None | No | 42.32  | 25.2  | 4    |
| CORE0218.V2.COVID.OP.PRO    | Oropharyngeal swab    | PRO | CORE0218 | V2 | COVID     | Human | None | No | 34.98  | 83.11 | 1.5  |
| CORE0218.V3.COVID.NP.PRO    | Nasopharyngeal swab   | PRO | CORE0218 | V3 | COVID     | Human | None | No | 55.39  | 50.25 | 2    |
| CORE0218.V3.COVID.OP.PRO    | Oropharyngeal swab    | PRO | CORE0218 | V3 | COVID     | Human | None | No | 24.16  | 81.94 | 1.5  |
| CORE0218.V4.COVID.NP.PRO    | Nasopharyngeal swab   | PRO | CORE0218 | V4 | COVID     | Human | None | No | 116.59 | 53.11 | 1.9  |
| CORE0218.V4.COVID.OP.PRO    | Oropharyngeal swab    | PRO | CORE0218 | V4 | COVID     | Human | None | No | 3.26   | 53.91 | 1.9  |
| CORE0218.V5.COVID.NP.PRO    | Nasopharyngeal swab   | PRO | CORE0218 | V5 | COVID     | Human | None | No | 25.41  | 50.94 | 2    |
| CORE0218.V5.COVID.OP.PRO    | Oropharyngeal swab    | PRO | CORE0218 | V5 | COVID     | Human | None | No | 18.17  | 73.71 | 1.5  |
| CORE0219.V1.COVID.NP.PRO    | Nasopharyngeal swab   | PRO | CORE0219 | V1 | COVID     | Human | None | No | 66.38  | 59.42 | 1.7  |
| CORE0219.V1.COVID.OP.PRO    | Oropharyngeal swab    | PRO | CORE0219 | V1 | COVID     | Human | None | No | 124.8  | 49.52 | 2    |
| CORE0219.V2.COVID.ETA.PRO   | Endotracheal aspirate | PRO | CORE0219 | V2 | COVID     | Human | None | No | 94.87  | 25.38 | 3.9  |
| CORE0219.V2.COVID.NP.PRO    | Nasopharyngeal swab   | PRO | CORE0219 | V2 | COVID     | Human | None | No | 28.41  | 60.35 | 1.7  |
| CORE0219.V2.COVID.OP.PRO    | Oropharyngeal swab    | PRO | CORE0219 | V2 | COVID     | Human | None | No | 110.34 | 71.51 | 1.5  |
| CORE0219.V3.COVID.NP.PRO    | Nasopharyngeal swab   | PRO | CORE0219 | V3 | COVID     | Human | None | No | 37.42  | 54.16 | 1.9  |
| CORE0219.V3.COVID.OP.PRO    | Oropharyngeal swab    | PRO | CORE0219 | V3 | COVID     | Human | None | No | 75.76  | 53.52 | 1.9  |
| CORE0237.V1.COVID.NP.PRO    | Nasopharyngeal swab   | PRO | CORE0237 | V1 | COVID     | Human | None | No | None   | 45.76 | 2.2  |
| CORE0237.V1.COVID.OP.PRO    | Oropharyngeal swab    | PRO | CORE0237 | V1 | COVID     | Human | None | No | None   | 85.5  | 1.5  |
| CORE0237.V2.COVID.NP.PRO    | Nasopharyngeal swab   | PRO | CORE0237 | V2 | COVID     | Human | None | No | None   | 27.88 | 3.6  |
| CORE0237.V2.COVID.OP.PRO    | Oropharyngeal swab    | PRO | CORE0237 | V2 | COVID     | Human | None | No | None   | 85.48 | 1.5  |
| CORE0237.V3.COVID.NP.PRO    | Nasopharyngeal swab   | PRO | CORE0237 | V3 | COVID     | Human | None | No | None   | 9.01  | 11.1 |
| CORE0237.V3.COVID.OP.PRO    | Oropharyngeal swab    | PRO | CORE0237 | V3 | COVID     | Human | None | No | None   | 0.9   | 38   |
| CORE0237.V4.COVID.NP.PRO    | Nasopharyngeal swab   | PRO | CORE0237 | V4 | COVID     | Human | None | No | None   | 19.61 | 5.1  |
| CORE0237.V4.COVID.OP.PRO    | Oropharyngeal swab    | PRO | CORE0237 | V4 | COVID     | Human | None | No | None   | 56.73 | 1.8  |
| CORE0237.V5.COVID.NP.PRO    | Nasopharyngeal swab   | PRO | CORE0237 | V5 | COVID     | Human | None | No | None   | 2.07  | 38   |
| CORE0237.V5.COVID.OP.PRO    | Oropharyngeal swab    | PRO | CORE0237 | V5 | COVID     | Human | None | No | None   | 40.64 | 2.5  |
| CORE0237.V6.COVID.NP.PRO    | Nasopharyngeal swab   | PRO | CORE0237 | V6 | COVID     | Human | None | No | None   | 23.71 | 4.2  |
| CORE0237.V6.COVID.OP.PRO    | Oropharyngeal swab    | PRO | CORE0237 | V6 | COVID     | Human | None | No | None   | 56.3  | 1.8  |
| CORE0237.V7.COVID.NP.PRO    | Nasopharyngeal swab   | PRO | CORE0237 | V7 | COVID     | Human | None | No | None   | 21.43 | 4.7  |
| CORE0237.V7.COVID.OP.PRO    | Oropharyngeal swab    | PRO | CORE0237 | V7 | COVID     | Human | None | No | None   | 40.14 | 2.5  |
| CORE0237.V8.COVID.NP.PRO    | Nasopharyngeal swab   | PRO | CORE0237 | V8 | COVID     | Human | None | No | None   | 9.92  | 10.1 |
| CORE0237.V8.COVID.OP.PRO    | Oropharyngeal swab    | PRO | CORE0237 | V8 | COVID     | Human | None | No | None   | 20.4  | 4.9  |
| CORE0237.V9.COVID.NP.PRO    | Nasopharyngeal swab   | PRO | CORE0237 | V9 | COVID     | Human | None | No | None   | 34.13 | 2.9  |
| CORE0237.V9.COVID.OP.PRO    | Oropharyngeal swab    | PRO | CORE0237 | V9 | COVID     | Human | None | No | None   | 33.95 | 3    |
| CORE0240.V1.COVID.NP.PRO    | Nasopharyngeal swab   | PRO | CORE0240 | V1 | COVID     | Human | None | No | None   | 46.15 | 2.2  |
| CORE0240.V2.COVID.NP.PRO    | Nasopharyngeal swab   | PRO | CORE0240 | V2 | COVID     | Human | None | No | None   | 52.03 | 1.9  |
| CORE0240.V2.COVID.OP.PRO    | Oropharyngeal swab    | PRO | CORE0240 | V2 | COVID     | Human | None | No | None   | 57.85 | 1.7  |
| CORE0261.V1.COVID.ETA.PRO   | Endotracheal aspirate | PRO | CORE0261 | V1 | COVID     | Human | None | No | 23.95  | 10.86 | 9.2  |
| CORE0261.V3.COVID.ETA.PRO   | Endotracheal aspirate | PRO | CORE0261 | V3 | COVID     | Human | None | No | 172.34 | 28.41 | 3.5  |
| CORE0261.V4.COVID.ETA.PRO   | Endotracheal aspirate | PRO | CORE0261 | V4 | COVID     | Human | None | No | 83.15  | 10.48 | 9.5  |
| CORE0280.V1.COVID.NP.PRO    | Nasopharyngeal swab   | PRO | CORE0280 | V1 | COVID     | Human | None | No | None   | 0.3   | 36   |
| CORE0280.V1.COVID.OP.PRO    | Oropharyngeal swab    | PRO | CORE0280 | V1 | COVID     | Human | None | No | None   | 0.21  | 36   |
| CORE0296.V1.nonCOVID.NP.PRO | Nasopharyngeal swab   | PRO | CORE0296 | V1 | non COVID | Human | None | No | None   | 0.15  | 38   |
| CORE0296.V1.nonCOVID.NP.P5  | Nasopharyngeal swab   | P5  | CORE0296 | V1 | non COVID | Human | None | No | None   | 0.4   | 38   |
| CORE0296.V1.nonCOVID.OP.PRO | Oropharyngeal swab    | PRO | CORE0296 | V1 | non COVID | Human | None | No | None   | 0.25  | 38   |
| CORE0296.V1.nonCOVID.OP.P5  | Oropharyngeal swab    | P5  | CORE0296 | V1 | non COVID | Human | None | No | None   | 1.18  | 38   |
| CORE0204.V1.COVID.NP.PRO    | Nasopharyngeal swab   | PRO | CORE0204 | V1 | COVID     | Human | None | No | 17.52  | 22.65 | 4.4  |
| CORE0204.V1.COVID.OP.PRO    | Oropharyngeal swab    | PRO | CORE0204 | V1 | COVID     | Human | None | No | 29.04  | 47.67 | 2.1  |
| CORE0204.V2.COVID.ETA.PRO   | Endotracheal aspirate | PRO | CORE0204 | V2 | COVID     | Human | None | No | None   | 26.38 | 3.8  |
| CORE0204.V2.COVID.NP.PRO    | Nasopharyngeal swab   | PRO | CORE0204 | V2 | COVID     | Human | None | No | 91.73  | 30.14 | 3.3  |
| CORE0204.V2.COVID.OP.PRO    | Oropharyngeal swab    | PRO | CORE0204 | V2 | COVID     | Human | None | No | 13.65  | 55.63 | 1.8  |
| CORE0204.V3.COVID.ETA.PRO   | Endotracheal aspirate | PRO | CORE0204 | V3 | COVID     | Human | None | No | None   | 20.21 | 5    |
| CORE0204.V3.COVID.NP.PRO    | Nasopharyngeal swab   | PRO | CORE0204 | V3 | COVID     | Human | None | No | 70.5   | 36.04 | 2.8  |
| CORE0204.V3.COVID.OP.PRO    | Oropharyngeal swab    | PRO | CORE0204 | V3 | COVID     | Human | None | No | 64.14  | 38.67 | 2.6  |
| CORE0204.V4.COVID.NP.PRO    | Nasopharyngeal swab   | PRO | CORE0204 | V4 | COVID     | Human | None | No | 86.97  | 45.14 | 2.2  |
| CORE0204.V4.COVID.OP.PRO    | Oropharyngeal swab    | PRO | CORE0204 | V4 | COVID     | Human | None | No | 11.47  | 46.47 | 2.2  |

|                              |                       |     |          |    |           |       |      |    |       |       |      |
|------------------------------|-----------------------|-----|----------|----|-----------|-------|------|----|-------|-------|------|
| CORE0204.V5.COVID.NP.PRO     | Nasopharyngeal swab   | PRO | CORE0204 | V5 | COVID     | Human | None | No | 88.44 | 46.81 | 2.1  |
| CORE0204.V5.COVID.OP.PRO     | Oropharyngeal swab    | PRO | CORE0204 | V5 | COVID     | Human | None | No | 45.61 | 67.65 | 1.5  |
| CORE0180.V1.nonCOVID.NP.P5   | Nasopharyngeal swab   | P5  | CORE0180 | V1 | non COVID | Human | None | No | None  | 16.54 | 6.1  |
| CORE0180.V1.nonCOVID.OP.P5   | Oropharyngeal swab    | P5  | CORE0180 | V1 | non COVID | Human | None | No | None  | 19.88 | 5    |
| CORE0180.V2.nonCOVID.ETA.PRO | Endotracheal aspirate | PRO | CORE0180 | V2 | non COVID | Human | None | No | None  | 14.15 | 7.1  |
| CORE0180.V2.nonCOVID.NP.P5   | Nasopharyngeal swab   | P5  | CORE0180 | V2 | non COVID | Human | None | No | None  | 12.67 | 7.9  |
| CORE0180.V2.nonCOVID.OP.P5   | Oropharyngeal swab    | P5  | CORE0180 | V2 | non COVID | Human | None | No | None  | 11.56 | 8.7  |
| CORE0180.V3.nonCOVID.NP.P5   | Nasopharyngeal swab   | P5  | CORE0180 | V3 | non COVID | Human | None | No | None  | 19.07 | 5.2  |
| CORE0180.V3.nonCOVID.OP.P5   | Oropharyngeal swab    | P5  | CORE0180 | V3 | non COVID | Human | None | No | None  | 2.77  | 36.1 |
| CORE0188.V1.nonCOVID.NP.P5   | Nasopharyngeal swab   | P5  | CORE0188 | V1 | non COVID | Human | None | No | None  | 17.51 | 5.7  |
| CORE0188.V1.nonCOVID.OP.P5   | Oropharyngeal swab    | P5  | CORE0188 | V1 | non COVID | Human | None | No | None  | 18.94 | 5.3  |
| CORE0188.V2.nonCOVID.NP.P5   | Nasopharyngeal swab   | P5  | CORE0188 | V2 | non COVID | Human | None | No | None  | 7.71  | 13   |
| CORE0188.V2.nonCOVID.OP.P5   | Oropharyngeal swab    | P5  | CORE0188 | V2 | non COVID | Human | None | No | None  | 15.53 | 6.4  |
| CORE0188.V3.nonCOVID.NP.P5   | Nasopharyngeal swab   | P5  | CORE0188 | V3 | non COVID | Human | None | No | None  | 8.24  | 12.1 |
| CORE0188.V3.nonCOVID.OP.P5   | Oropharyngeal swab    | P5  | CORE0188 | V3 | non COVID | Human | None | No | None  | 0.97  | 38   |
| CORE0188.V4.nonCOVID.NP.P5   | Nasopharyngeal swab   | P5  | CORE0188 | V4 | non COVID | Human | None | No | None  | 11.76 | 8.5  |
| CORE0188.V4.nonCOVID.OP.P5   | Oropharyngeal swab    | P5  | CORE0188 | V4 | non COVID | Human | None | No | None  | 0.07  | 38   |
| CORE0275.V1.COVID.NP.PRO     | Nasopharyngeal swab   | PRO | CORE0275 | V1 | COVID     | Human | None | No | None  | 0.39  | 36   |
| CORE0275.V1.COVID.OP.PRO     | Oropharyngeal swab    | PRO | CORE0275 | V1 | COVID     | Human | None | No | None  | 0.48  | 36   |
| CORE0275.V2.COVID.NP.PRO     | Nasopharyngeal swab   | PRO | CORE0275 | V2 | COVID     | Human | None | No | None  | 58.83 | 1.7  |
| CORE0275.V2.COVID.OP.PRO     | Oropharyngeal swab    | PRO | CORE0275 | V2 | COVID     | Human | None | No | None  | 56.76 | 1.8  |
| CORE0275.V3.COVID.NP.PRO     | Nasopharyngeal swab   | PRO | CORE0275 | V3 | COVID     | Human | None | No | None  | 53.19 | 1.9  |
| CORE0275.V3.COVID.OP.PRO     | Oropharyngeal swab    | PRO | CORE0275 | V3 | COVID     | Human | None | No | None  | 59.35 | 1.7  |
| CORE0275.V4.COVID.NP.PRO     | Nasopharyngeal swab   | PRO | CORE0275 | V4 | COVID     | Human | None | No | None  | 24.52 | 4.1  |
| CORE0275.V4.COVID.OP.PRO     | Oropharyngeal swab    | PRO | CORE0275 | V4 | COVID     | Human | None | No | None  | 61.38 | 1.6  |
| CORE0282.V1.COVID.ETA.PRO    | Endotracheal aspirate | PRO | CORE0282 | V1 | COVID     | Human | None | No | 36.59 | 5.07  | 19.7 |
| CORE0282.V1.COVID.NP.PRO     | Nasopharyngeal swab   | PRO | CORE0282 | V1 | COVID     | Human | None | No | None  | 42.32 | 2.4  |
| CORE0282.V1.COVID.OP.PRO     | Oropharyngeal swab    | PRO | CORE0282 | V1 | COVID     | Human | None | No | None  | 62.88 | 1.6  |
| CORE0282.V2.COVID.NP.PRO     | Nasopharyngeal swab   | PRO | CORE0282 | V2 | COVID     | Human | None | No | None  | 13.86 | 7.2  |
| CORE0282.V2.COVID.OP.PRO     | Oropharyngeal swab    | PRO | CORE0282 | V2 | COVID     | Human | None | No | None  | 10    | 10   |
| CORE0282.V3.COVID.NP.PRO     | Nasopharyngeal swab   | PRO | CORE0282 | V3 | COVID     | Human | None | No | None  | 22.37 | 4.5  |
| CORE0282.V3.COVID.OP.PRO     | Oropharyngeal swab    | PRO | CORE0282 | V3 | COVID     | Human | None | No | None  | 53.89 | 1.9  |
| CORE0282.V4.COVID.NP.PRO     | Nasopharyngeal swab   | PRO | CORE0282 | V4 | COVID     | Human | None | No | None  | 1.49  | 36   |
| CORE0282.V4.COVID.OP.PRO     | Oropharyngeal swab    | PRO | CORE0282 | V4 | COVID     | Human | None | No | None  | 1.38  | 36   |
| CORE0282.V5.COVID.NP.PRO     | Nasopharyngeal swab   | PRO | CORE0282 | V5 | COVID     | Human | None | No | None  | 0.33  | 36   |
| CORE0282.V5.COVID.OP.PRO     | Oropharyngeal swab    | PRO | CORE0282 | V5 | COVID     | Human | None | No | None  | 0.09  | 38   |
| CORE0294.V1.nonCOVID.NP.PRO  | Nasopharyngeal swab   | PRO | CORE0294 | V1 | non COVID | Human | None | No | None  | 42.81 | 2.3  |
| CORE0294.V1.nonCOVID.NP.P5   | Nasopharyngeal swab   | P5  | CORE0294 | V1 | non COVID | Human | None | No | None  | 49.98 | 2    |
| CORE0294.V1.nonCOVID.OP.PRO  | Oropharyngeal swab    | PRO | CORE0294 | V1 | non COVID | Human | None | No | None  | 67.8  | 1.5  |
| CORE0294.V1.nonCOVID.OP.P5   | Oropharyngeal swab    | P5  | CORE0294 | V1 | non COVID | Human | None | No | None  | 23.08 | 4.3  |
| CORE0187.V1.nonCOVID.NP.P5   | Nasopharyngeal swab   | P5  | CORE0187 | V1 | non COVID | Human | None | No | None  | 43.44 | 2.3  |
| CORE0187.V1.nonCOVID.OP.P5   | Oropharyngeal swab    | P5  | CORE0187 | V1 | non COVID | Human | None | No | None  | 48.31 | 2.1  |
| CORE0187.V2.nonCOVID.ETA.PRO | Endotracheal aspirate | PRO | CORE0187 | V2 | non COVID | Human | None | No | None  | 31.34 | 3.2  |
| CORE0187.V2.nonCOVID.NP.P5   | Nasopharyngeal swab   | P5  | CORE0187 | V2 | non COVID | Human | None | No | None  | 37.67 | 2.7  |
| CORE0187.V2.nonCOVID.OP.P5   | Oropharyngeal swab    | P5  | CORE0187 | V2 | non COVID | Human | None | No | None  | 38.64 | 2.6  |
| CORE0187.V3.nonCOVID.NP.P5   | Nasopharyngeal swab   | P5  | CORE0187 | V3 | non COVID | Human | None | No | None  | 52.07 | 1.9  |
| CORE0187.V3.nonCOVID.OP.P5   | Oropharyngeal swab    | P5  | CORE0187 | V3 | non COVID | Human | None | No | None  | 50.73 | 2    |
| CORE0276.V1.COVID.NP.PRO     | Nasopharyngeal swab   | PRO | CORE0276 | V1 | COVID     | Human | None | No | None  | 0.18  | 36   |
| CORE0276.V1.COVID.OP.PRO     | Oropharyngeal swab    | PRO | CORE0276 | V1 | COVID     | Human | None | No | None  | 0.14  | 36   |
