# Supplementary material for: Signatures of COVID-19 Severity and Immune Response in the Respiratory Tract Microbiome
Source: PubMed Central journal article supplement (PMC8406335; doi:10.1128/mbio.01777-21), 2021-08-17
Supplement: mbio.01777-21-st003.pdf [file mbio.01777-21-st003.pdf]

**Table S3. Results of qPCR assays to quantify Anelloviridae and Redondoviridae levels.**

| SampleID                     | ttv_ct       | ttv_copy    | rv_ct        | rv_copy     |
|------------------------------|--------------|-------------|--------------|-------------|
| CORE0260.V4.COVID.OP.PRO     | Undetermined | 0           | 21.90873019  | 2404576.604 |
| CORE0196.V3.COVID.OP.PRO     | Undetermined | 0           | 24.06678581  | 220602.0573 |
| CORE0203.V3.COVID.OP.PRO     | Undetermined | 0           | 25.17985662  | 107148.0352 |
| CORE0248.V2.COVID.OP.PRO     | Undetermined | 0           | 25.33306758  | 138491.0026 |
| CORE0221.V1.COVID.OP.PRO     | Undetermined | 0           | 25.62192472  | 73821.08724 |
| CORE0196.V6.COVID.OP.PRO     | Undetermined | 0           | 26.17271932  | 49146.05599 |
| CORE0227.V1.COVID.OP.PRO     | Undetermined | 0           | 27.19131152  | 26067.78337 |
| CORE0211.V1.COVID.OP.PRO     | 37.38286972  | 3.392       | 29.10970561  | 19764.91677 |
| CORE0204.V1.COVID.OP.PRO     | 35.03816986  | 27.777      | 29.20874977  | 30286.22571 |
| CORE0248.V3.COVID.OP.PRO     | Undetermined | 0           | 29.54088338  | 13209.88127 |
| CORE0205.V2.COVID.OP.PRO     | Undetermined | 0           | 30.5138429   | 6372.855428 |
| CORE0197.V4.COVID.OP.PRO     | Undetermined | 0           | 31.25070572  | 16232.77297 |
| CORE0203.V4.COVID.OP.PRO     | Undetermined | 0           | 31.27158674  | 1506.519033 |
| CORE0211.V2.COVID.ETA.PRO    | Undetermined | 0           | 32.18125343  | 288.1639938 |
| CORE0203.V2.COVID.OP.PRO     | 37.55819321  | 8.0001      | 32.87889163  | 388.4609375 |
| CORE0221.V2.COVID.OP.PRO     | Undetermined | 0           | 33.20122147  | 1106.850712 |
| CORE0295.V1.nonCOVID.OP.PS   | Undetermined | 0           | 34.62224197  | 1761.377507 |
| CORE0260.V3.COVID.OP.PRO     | Undetermined | 0           | 34.73281924  | 499.5622937 |
| CORE0203.V2.COVID.ETA.PRO    | Undetermined | 0           | 36.11144002  | 205.7604586 |
| CORE0204.V2.COVID.OP.PRO     | Undetermined | 0           | 36.73073387  | 23.81450915 |
| CORE0227.V2.COVID.OP.PRO     | Undetermined | 0           | 37.63503456  | 54.31451797 |
| CORE0203.V1.COVID.OP.PRO     | Undetermined | 0           | 38.39667511  | 3.127684593 |
| CORE0255.V1.COVID.NP.PRO     | 8.023150444  | 2004329344  | Undetermined | 0           |
| CORE0203.V4.COVID.ETA.PRO    | 13.27375746  | 127563812   | Undetermined | 0           |
| CORE0263.V6.COVID.NP.PRO     | 24.64973068  | 27858.68952 | Undetermined | 0           |
| CORE0263.V6.COVID.ETA.PRO    | 25.14343071  | 60431.699   | Undetermined | 0           |
| CORE0187.V1.nonCOVID.OP.PS   | 26.52873103  | 102931.9338 | Undetermined | 0           |
| CORE0275.V4.COVID.OP.PRO     | 26.93263817  | 6056.070426 | Undetermined | 0           |
| CORE0275.V2.COVID.OP.PRO     | 27.07812627  | 6475.126814 | Undetermined | 0           |
| CORE0275.V3.COVID.OP.PRO     | 27.36677361  | 4421.530503 | Undetermined | 0           |
| CORE0187.V1.nonCOVID.NP.PS   | 27.58120918  | 38798.93241 | Undetermined | 0           |
| CORE0263.V5.COVID.NP.PRO     | 27.58805021  | 3795.938492 | Undetermined | 0           |
| CORE0187.V3.nonCOVID.NP.PS   | 27.96755981  | 60916.05491 | Undetermined | 0           |
| CORE0255.V6.COVID.OP.PRO     | 28.79712741  | 2434.560545 | Undetermined | 0           |
| CORE0275.V3.COVID.NP.PRO     | 28.85164642  | 1860.691822 | Undetermined | 0           |
| CORE0187.V2.nonCOVID.NP.PS   | 29.15480614  | 31006.94037 | Undetermined | 0           |
| CORE0263.V5.COVID.ETA.PRO    | 29.41250038  | 5726.687    | Undetermined | 0           |
| CORE0206.V1.COVID.NP.PRO     | 29.58557638  | 1172.667891 | Undetermined | 0           |
| CORE0181.V4.nonCOVID.OP.PS   | 29.91299629  | 2364.552318 | Undetermined | 0           |
| CORE0206.V3.COVID.ETA.PRO    | 30.02832413  | 2139.955688 | Undetermined | 0           |
| CORE0187.V2.nonCOVID.OP.PS   | 30.05544345  | 12118.84686 | Undetermined | 0           |
| CORE0180.V2.nonCOVID.ETA.PRO | 30.24927044  | 2188.204259 | Undetermined | 0           |
| CORE0181.V3.nonCOVID.OP.PS   | 30.32191181  | 1719.429823 | Undetermined | 0           |
| CORE0255.V6.COVID.ETA.PRO    | 30.3742733   | 1302.367    | Undetermined | 0           |
| CORE0263.V1.COVID.NP.PRO     | 30.39976056  | 604.8591995 | Undetermined | 0           |
| CORE0210.V1.COVID.ETA.PRO    | 30.56324005  | 332.6386108 | Undetermined | 0           |
| CORE0185.V4.nonCOVID.NP.PS   | 30.60750008  | 1000        | Undetermined | 0           |
| CORE0181.V3.nonCOVID.ETA.PRO | 30.69320869  | 7259.205127 | Undetermined | 0           |
| CORE0288.V3.COVID.ETA.PRO    | 30.96118164  | 1000        | Undetermined | 0           |
| CORE0180.V1.nonCOVID.NP.PS   | 31.08769321  | 1018.096486 | Undetermined | 0           |
| CORE0263.V5.COVID.OP.PRO     | 31.09645398  | 374.8508068 | Undetermined | 0           |
| CORE0206.V1.COVID.ETA.PRO    | 31.31845029  | 1065.522644 | Undetermined | 0           |
| CORE0237.V3.COVID.NP.PRO     | 31.4683183   | 635.7533217 | Undetermined | 0           |
| CORE0187.V2.nonCOVID.ETA.PRO | 31.79879697  | 4937.957814 | Undetermined | 0           |
| CORE0263.V2.COVID.OP.PRO     | 31.82056554  | 228.9634192 | Undetermined | 0           |
| CORE0206.V1.COVID.OP.PRO     | 31.91152382  | 219.4428009 | Undetermined | 0           |
| CORE0181.V1.nonCOVID.OP.PS   | 31.98509502  | 655.2206453 | Undetermined | 0           |
| CORE0206.V2.COVID.OP.PRO     | 32.30992381  | 159.7716081 | Undetermined | 0           |
| CORE0263.V3.COVID.OP.PRO     | 32.43441137  | 149.5595595 | Undetermined | 0           |
| CORE0218.V2.COVID.ETA.PRO    | 32.51799711  | 178.665     | Undetermined | 0           |
| CORE0255.V3.COVID.ETA.PRO    | 32.57891846  | 262.929     | Undetermined | 0           |
| CORE0204.V1.COVID.NP.PRO     | 33.03251648  | 256.777     | Undetermined | 0           |
| CORE0251.V4.COVID.OP.PRO     | 33.47891235  | 99.56077373 | Undetermined | 0           |
| CORE0275.V4.COVID.NP.PRO     | 33.50373713  | 80.64315659 | Undetermined | 0           |
| CORE0181.V2.nonCOVID.ETA.PRO | 33.60037804  | 222.8435585 | Undetermined | 0           |
| CORE0251.V3.COVID.OP.PRO     | 33.66664569  | 201.807329  | Undetermined | 0           |
| CORE0237.V1.COVID.NP.PRO     | 33.86125692  | 215.1060396 | Undetermined | 0           |
| CORE0251.V2.COVID.NP.PRO     | 33.91192881  | 64.24984082 | Undetermined | 0           |
| CORE0180.V1.nonCOVID.OP.PS   | 34.69527054  | 94.26752914 | Undetermined | 0           |
| CORE0263.V3.COVID.NP.PRO     | 34.72804515  | 37.42050178 | Undetermined | 0           |
| CORE0225.V2.COVID.OP.PRO     | 34.77864456  | 77.97517014 | Undetermined | 0           |
| CORE0239.V1.COVID.OP.PRO     | 34.87983068  | 59.11471066 | Undetermined | 0           |
| CORE0207.V2.COVID.NP.PRO     | 34.94377899  | 20.852      | Undetermined | 0           |
| CORE0275.V2.COVID.NP.PRO     | 35.04739761  | 27.75885747 | Undetermined | 0           |
| CORE0252.V6.COVID.OP.PRO     | 35.05678622  | 227.7935086 | Undetermined | 0           |
| CORE0207.V2.COVID.OP.PRO     | 35.11509323  | 16.478      | Undetermined | 0           |
| CORE0263.V1.COVID.OP.PRO     | 35.48049164  | 23.00827666 | Undetermined | 0           |
| CORE0263.V4.COVID.OP.PRO     | 35.48067729  | 21.0972061  | Undetermined | 0           |
| CORE0252.V4.COVID.NP.PRO     | 35.52054342  | 21.86799259 | Undetermined | 0           |
| CORE0255.V5.COVID.OP.PRO     | 35.61569595  | 21.76948166 | Undetermined | 0           |
| CORE0216.V1.COVID.OP.PRO     | 35.97783852  | 10.072      | Undetermined | 0           |
| CORE0252.V5.COVID.ETA.PRO    | 36.15178299  | 34.421      | Undetermined | 0           |
| CORE0261.V1.COVID.ETA.PRO    | 36.38734627  | 19.727      | Undetermined | 0           |
| CORE0212.V1.COVID.OP.PRO     | 36.53817749  | 6.889       | Undetermined | 0           |
| CORE0269.V4.COVID.NP.PRO     | 36.69234848  | 9.565162659 | Undetermined | 0           |
| CORE0263.V1.COVID.ETA.PRO    | 36.72153727  | 7.7         | Undetermined | 0           |
| CORE0255.V5.COVID.ETA.PRO    | 36.75959015  | 6.777       | Undetermined | 0           |
| CORE0213.V3.COVID.OP.PRO     | 36.78461075  | 5.147       | Undetermined | 0           |
| CORE0252.V3.COVID.OP.PRO     | 36.8374939   | 9.869452477 | Undetermined | 0           |
| CORE0205.V1.COVID.NP.PRO     | 36.84800339  | 5.649       | Undetermined | 0           |
| CORE0251.V2.COVID.ETA.PRO    | 37.07096227  | 5.685       | Undetermined | 0           |
| CORE0252.V6.COVID.NP.PRO     | 37.25024414  | 7.503951073 | Undetermined | 0           |
| CORE0251.V1.COVID.NP.PRO     | 37.29006577  | 4.941350937 | Undetermined | 0           |
| CORE0201.V1.COVID.NP.PRO     | 37.35193253  | 4.6755      | Undetermined | 0           |
| CORE0255.V4.COVID.OP.PRO     | 37.38393021  | 6.795       | Undetermined | 0           |

|                              |              |             |              |   |
|------------------------------|--------------|-------------|--------------|---|
| CORE0225.V5.COVID.NP.PRO     | 37.38463593  | 4.158       | Undetermined | 0 |
| CORE0223.V1.COVID.OP.PRO     | 37.41020203  | 7.991751194 | Undetermined | 0 |
| CORE0212.V4.COVID.ETA.PRO    | 37.61727524  | 8.429       | Undetermined | 0 |
| CORE0245.V1.COVID.NP.PRO     | 37.62509155  | 5.792       | Undetermined | 0 |
| CORE0252.V5.COVID.OP.PRO     | 37.65855789  | 5.665       | Undetermined | 0 |
| CORE0222.V1.COVID.OP.PRO     | 37.72810364  | 6.219816147 | Undetermined | 0 |
| CORE0237.V2.COVID.NP.PRO     | 37.83757019  | 6.038749695 | Undetermined | 0 |
| CORE0242.V4.COVID.NP.PRO     | 37.90576935  | 4.809       | Undetermined | 0 |
| CORE0252.V3.COVID.ETA.PRO    | 38.00390625  | 2.754       | Undetermined | 0 |
| CORE0181.V3.nonCOVID.NP.PS   | 38.01374435  | 7.747714043 | Undetermined | 0 |
| CORE0181.V2.nonCOVID.OP.PS   | 38.04965401  | 10.12677384 | Undetermined | 0 |
| CORE0252.V2.COVID.ETA.PRO    | 38.09830348  | 3.682       | Undetermined | 0 |
| CORE0184.V1.nonCOVID.OP.PS   | 38.14196396  | 12.185      | Undetermined | 0 |
| CORE0180.V2.nonCOVID.OP.PS   | 38.25907898  | 12.05943691 | Undetermined | 0 |
| CORE0218.V1.COVID.OP.PRO     | 38.34646606  | 1.733       | Undetermined | 0 |
| CORE0225.V1.COVID.ETA.PRO    | 38.3864212   | 1.777       | Undetermined | 0 |
| CORE0226.V1.COVID.OP.PRO     | 38.48120117  | 3.959773779 | Undetermined | 0 |
| CORE0276.V1.COVID.OP.PRO     | 38.5529213   | 2.741428494 | Undetermined | 0 |
| CORE0206.V3.COVID.OP.PRO     | 38.70135498  | 1.441       | Undetermined | 0 |
| CORE0230.V2.COVID.NP.PRO     | 38.85615349  | 2.226162068 | Undetermined | 0 |
| CORE0228.V1.COVID.OP.PRO     | 38.93333054  | 1.417       | Undetermined | 0 |
| CORE0262.V2.COVID.OP.PRO     | 38.97470093  | 1.563       | Undetermined | 0 |
| CORE0263.V6.COVID.OP.PRO     | 39.3656044   | 1.992993474 | Undetermined | 0 |
| CORE0252.V3.COVID.NP.PRO     | 39.52157974  | 1.033163786 | Undetermined | 0 |
| CORE0225.V6.COVID.OP.PRO     | 39.6403923   | 0.867       | Undetermined | 0 |
| CORE0255.V4.COVID.NP.PRO     | 39.67790604  | 1.497451901 | Undetermined | 0 |
| CORE0181.V2.nonCOVID.NP.PS   | 39.71445084  | 2.445384264 | Undetermined | 0 |
| CORE0179.V1.nonCOVID.NP.PS   | Undetermined | 0           | Undetermined | 0 |
| CORE0179.V1.nonCOVID.OP.PS   | Undetermined | 0           | Undetermined | 0 |
| CORE0179.V2.nonCOVID.NP.PS   | Undetermined | 0           | Undetermined | 0 |
| CORE0179.V2.nonCOVID.OP.PS   | Undetermined | 0           | Undetermined | 0 |
| CORE0180.V3.nonCOVID.NP.PS   | Undetermined | 0           | Undetermined | 0 |
| CORE0180.V3.nonCOVID.OP.PS   | Undetermined | 0           | Undetermined | 0 |
| CORE0180.V2.nonCOVID.NP.PS   | Undetermined | 0           | Undetermined | 0 |
| CORE0181.V4.nonCOVID.NP.PS   | Undetermined | 0           | Undetermined | 0 |
| CORE0181.V1.nonCOVID.NP.PS   | Undetermined | 0           | Undetermined | 0 |
| CORE0182.V1.nonCOVID.NP.PS   | Undetermined | 0           | Undetermined | 0 |
| CORE0182.V1.nonCOVID.OP.PS   | Undetermined | 0           | Undetermined | 0 |
| CORE0184.V1.nonCOVID.NP.PS   | Undetermined | 0           | Undetermined | 0 |
| CORE0185.V4.nonCOVID.OP.PS   | Undetermined | 0           | Undetermined | 0 |
| CORE0185.V1.nonCOVID.NP.PS   | Undetermined | 0           | Undetermined | 0 |
| CORE0185.V2.nonCOVID.ETA.PRO | Undetermined | 0           | Undetermined | 0 |
| CORE0185.V1.nonCOVID.OP.PS   | Undetermined | 0           | Undetermined | 0 |
| CORE0185.V2.nonCOVID.NP.PS   | Undetermined | 0           | Undetermined | 0 |
| CORE0185.V2.nonCOVID.OP.PS   | Undetermined | 0           | Undetermined | 0 |
| CORE0185.V3.nonCOVID.NP.PS   | Undetermined | 0           | Undetermined | 0 |
| CORE0185.V3.nonCOVID.OP.PS   | Undetermined | 0           | Undetermined | 0 |
| CORE0187.V3.nonCOVID.OP.PS   | Undetermined | 0           | Undetermined | 0 |
| CORE0188.V1.nonCOVID.NP.PS   | Undetermined | 0           | Undetermined | 0 |
| CORE0188.V1.nonCOVID.OP.PS   | Undetermined | 0           | Undetermined | 0 |
| CORE0188.V2.nonCOVID.NP.PS   | Undetermined | 0           | Undetermined | 0 |
| CORE0188.V2.nonCOVID.OP.PS   | Undetermined | 0           | Undetermined | 0 |
| CORE0188.V3.nonCOVID.NP.PS   | Undetermined | 0           | Undetermined | 0 |
| CORE0188.V3.nonCOVID.OP.PS   | Undetermined | 0           | Undetermined | 0 |
| CORE0188.V4.nonCOVID.NP.PS   | Undetermined | 0           | Undetermined | 0 |
| CORE0188.V4.nonCOVID.OP.PS   | Undetermined | 0           | Undetermined | 0 |
| CORE0189.V1.nonCOVID.NP.PS   | Undetermined | 0           | Undetermined | 0 |
| CORE0189.V4.nonCOVID.OP.PS   | Undetermined | 0           | Undetermined | 0 |
| CORE0189.V1.nonCOVID.OP.PS   | Undetermined | 0           | Undetermined | 0 |
| CORE0189.V2.nonCOVID.NP.PS   | Undetermined | 0           | Undetermined | 0 |
| CORE0189.V2.nonCOVID.OP.PS   | Undetermined | 0           | Undetermined | 0 |
| CORE0189.V3.nonCOVID.ETA.PRO | Undetermined | 0           | Undetermined | 0 |
| CORE0189.V4.nonCOVID.ETA.PRO | Undetermined | 0           | Undetermined | 0 |
| CORE0189.V3.nonCOVID.NP.PS   | Undetermined | 0           | Undetermined | 0 |
| CORE0189.V3.nonCOVID.OP.PS   | Undetermined | 0           | Undetermined | 0 |
| CORE0189.V4.nonCOVID.NP.PS   | Undetermined | 0           | Undetermined | 0 |
| CORE0190.V1.nonCOVID.NP.PS   | Undetermined | 0           | Undetermined | 0 |
| CORE0190.V1.nonCOVID.OP.PS   | Undetermined | 0           | Undetermined | 0 |
| CORE0190.V2.nonCOVID.NP.PS   | Undetermined | 0           | Undetermined | 0 |
| CORE0190.V2.nonCOVID.OP.PS   | Undetermined | 0           | Undetermined | 0 |
| CORE0294.V1.nonCOVID.NP.PS   | Undetermined | 0           | Undetermined | 0 |
| CORE0294.V1.nonCOVID.OP.PS   | Undetermined | 0           | Undetermined | 0 |
| CORE0294.V1.nonCOVID.NP.PRO  | Undetermined | 0           | Undetermined | 0 |
| CORE0294.V1.nonCOVID.OP.PRO  | Undetermined | 0           | Undetermined | 0 |
| CORE0295.V1.nonCOVID.NP.PS   | Undetermined | 0           | Undetermined | 0 |
| CORE0295.V1.nonCOVID.NP.PRO  | Undetermined | 0           | Undetermined | 0 |
| CORE0295.V1.nonCOVID.OP.PRO  | Undetermined | 0           | Undetermined | 0 |
| CORE0296.V1.nonCOVID.NP.PS   | Undetermined | 0           | Undetermined | 0 |
| CORE0296.V1.nonCOVID.OP.PS   | Undetermined | 0           | Undetermined | 0 |
| CORE0296.V1.nonCOVID.NP.PRO  | Undetermined | 0           | Undetermined | 0 |
| CORE0296.V1.nonCOVID.OP.PRO  | Undetermined | 0           | Undetermined | 0 |
| CORE0193.V5.COVID.OP.PRO     | Undetermined | 0           | Undetermined | 0 |
| CORE0193.V5.COVID.NP.PRO     | Undetermined | 0           | Undetermined | 0 |
| CORE0196.V5.COVID.ETA.PRO    | Undetermined | 0           | Undetermined | 0 |
| CORE0196.V2.COVID.ETA.PRO    | Undetermined | 0           | Undetermined | 0 |
| CORE0196.V3.COVID.ETA.PRO    | Undetermined | 0           | Undetermined | 0 |
| CORE0196.V6.COVID.NP.PRO     | Undetermined | 0           | Undetermined | 0 |
| CORE0196.V3.COVID.NP.PRO     | Undetermined | 0           | Undetermined | 0 |
| CORE0196.V7.COVID.NP.PRO     | Undetermined | 0           | Undetermined | 0 |
| CORE0196.V4.COVID.NP.PRO     | Undetermined | 0           | Undetermined | 0 |
| CORE0196.V7.COVID.OP.PRO     | Undetermined | 0           | Undetermined | 0 |
| CORE0196.V4.COVID.OP.PRO     | Undetermined | 0           | Undetermined | 0 |
| CORE0196.V5.COVID.NP.PRO     | Undetermined | 0           | Undetermined | 0 |
| CORE0196.V5.COVID.OP.PRO     | Undetermined | 0           | Undetermined | 0 |
| CORE0197.V2.COVID.ETA.PRO    | Undetermined | 0           | Undetermined | 0 |
| CORE0197.V6.COVID.ETA.PRO    | Undetermined | 0           | Undetermined | 0 |
| CORE0197.V5.COVID.NP.PRO     | Undetermined | 0           | Undetermined | 0 |
| CORE0197.V5.COVID.OP.PRO     | Undetermined | 0           | Undetermined | 0 |
