# Supplementary material for: Signatures of COVID-19 Severity and Immune Response in the Respiratory Tract Microbiome
Source: PubMed Central journal article supplement (PMC8406335; doi:10.1128/mbio.01777-21), 2021-08-17
Supplement: mbio.01777-21-st005.pdf [file mbio.01777-21-st005.pdf]

**Table S5. Synthetic oligonucleotides used in this study.**

| <b>ID</b>           | <b>Sequence (5'-3')</b>           | <b>Description</b>                                         |
|---------------------|-----------------------------------|------------------------------------------------------------|
| pan-HCRV-AA-Fwd     | GCAGAGTTGTCAGCACATT               | Pan-Redondovirus qPCR forward primer                       |
| pan-HCRV-AA-Rev     | ATACCAGTATAGGAAGATTTGAG           | Pan-Redondovirus qPCR reverse primer                       |
| pan-HCRV-AA-Probe   | AAATGGAAGGGAGAGAGGCCTTTGG         | Pan-Redondovirus qPCR TaqMan probe                         |
| TTV_3656_Fwd        | AGACTCCGACDTCCYMTTGG              | Pan-TTV qPCR forward primer                                |
| TTV_3656_Rev        | CTYCCVCTGGCBGCYGTGAC              | Pan-TTV qPCR reverse primer                                |
| TTV_3656_Probe      | GAAAGTGAGTGGGGCCAGAC              | Pan-TTV qPCR TaqMan probe                                  |
| V1-Read1-seq        | TATGGTAATTGTAGAGTTTGATCCTGGCTCAG  | Sequencing Primer                                          |
| V2-Read2-seq        | AGTCAGTCAGCCTGCTGCCGCCGTAGGAGT    | Sequencing Primer                                          |
| V1V2-Index1-seq     | ACTCCTACGGGAGGCAGCAGGCTGACTGACT   | Sequencing Primer                                          |
| V1V2_Forward (27F)  | AGAGTTTGATCCTGGCTCAG              | Bacterial 16S rRNA gene V1V2 amplification primer, forward |
| V1V2_Reverse (338R) | TGCTGCCTCCCGTAGGAGT               | Bacterial 16S rRNA gene V1V2 amplification primer, reverse |
| 2019-nCoV_N1-F      | GACCCCAAATCAGCGAAAT               | SARS-CoV-1 qPCR forward primer                             |
| 2019-nCoV_N1-R      | TCTGGTTACTGCCAGTTGAATCTG          | SARS-CoV-1 qPCR reverse primer                             |
| 2019_nCoV_N1-P      | FAM-ACCCCGCATTACGTTTGGTGGACC-IBFQ | SARS-CoV-1 qPCR probe                                      |
