# Supplementary material for: Signatures of COVID-19 Severity and Immune Response in the Respiratory Tract Microbiome
Source: PubMed Central journal article supplement (PMC8406335; doi:10.1128/mbio.01777-21), 2021-08-17
Supplement: mbio.01777-21-st006.pdf [file mbio.01777-21-st006.pdf]

Table S6. Accession numbers of sequence data generated in this study.

| SampleID                     | AccessionID | Bioproject_Accession |
|------------------------------|-------------|----------------------|
| CORE0179.V1.norCOVID.NP.PS   | SRR12129721 | PRIN4683617          |
| CORE0179.V1.norCOVID.OP.PS   | SRR12129720 | PRIN4683617          |
| CORE0179.V2.norCOVID.NP.PS   | SRR12129284 | PRIN4683617          |
| CORE0179.V2.norCOVID.OP.PS   | SRR12129510 | PRIN4683617          |
| CORE0180.V1.norCOVID.NP.PS   | SRR12129258 | PRIN4683617          |
| CORE0180.V1.norCOVID.OP.PS   | SRR12129584 | PRIN4683617          |
| CORE0180.V2.norCOVID.ETA.PRO | SRR12129232 | PRIN4683617          |
| CORE0180.V2.norCOVID.NP.PS   | SRR12129548 | PRIN4683617          |
| CORE0180.V2.norCOVID.OP.PS   | SRR12129554 | PRIN4683617          |
| CORE0180.V3.norCOVID.NP.PS   | SRR12129320 | PRIN4683617          |
| CORE0180.V3.norCOVID.OP.PS   | SRR12129719 | PRIN4683617          |
| CORE0181.V1.norCOVID.NP.PS   | SRR12129652 | PRIN4683617          |
| CORE0181.V1.norCOVID.OP.PS   | SRR12129641 | PRIN4683617          |
| CORE0181.V2.norCOVID.ETA.PRO | SRR12129490 | PRIN4683617          |
| CORE0181.V2.norCOVID.NP.PS   | SRR12129479 | PRIN4683617          |
| CORE0181.V2.norCOVID.OP.PS   | SRR12129468 | PRIN4683617          |
| CORE0181.V3.norCOVID.ETA.PRO | SRR12129402 | PRIN4683617          |
| CORE0181.V3.norCOVID.NP.PS   | SRR12129391 | PRIN4683617          |
| CORE0181.V3.norCOVID.OP.PS   | SRR12129306 | PRIN4683617          |
| CORE0181.V4.norCOVID.NP.PS   | SRR12129295 | PRIN4683617          |
| CORE0181.V4.norCOVID.OP.PS   | SRR12129283 | PRIN4683617          |
| CORE0182.V1.norCOVID.NP.PS   | SRR12129216 | PRIN4683617          |
| CORE0182.V1.norCOVID.OP.PS   | SRR12129205 | PRIN4683617          |
| CORE0184.V1.norCOVID.NP.PS   | SRR12129134 | PRIN4683617          |
| CORE0184.V1.norCOVID.OP.PS   | SRR12129122 | PRIN4683617          |
| CORE0185.V1.norCOVID.NP.PS   | SRR12129814 | PRIN4683617          |
| CORE0185.V1.norCOVID.OP.PS   | SRR12129710 | PRIN4683617          |
| CORE0185.V2.norCOVID.ETA.PRO | SRR12129699 | PRIN4683617          |
| CORE0185.V2.norCOVID.NP.PS   | SRR12129632 | PRIN4683617          |
| CORE0185.V2.norCOVID.OP.PS   | SRR12129621 | PRIN4683617          |
| CORE0185.V3.norCOVID.NP.PS   | SRR12129609 | PRIN4683617          |
| CORE0185.V3.norCOVID.OP.PS   | SRR12129542 | PRIN4683617          |
| CORE0185.V4.norCOVID.NP.PS   | SRR12129531 | PRIN4683617          |
| CORE0185.V4.norCOVID.OP.PS   | SRR12129484 | PRIN4683617          |
| CORE0187.V1.norCOVID.NP.PS   | SRR12129453 | PRIN4683617          |
| CORE0187.V1.norCOVID.OP.PS   | SRR12129442 | PRIN4683617          |
| CORE0187.V2.norCOVID.ETA.PRO | SRR12129376 | PRIN4683617          |
| CORE0187.V2.norCOVID.NP.PS   | SRR12129365 | PRIN4683617          |
| CORE0187.V2.norCOVID.OP.PS   | SRR12129280 | PRIN4683617          |
| CORE0187.V3.norCOVID.NP.PS   | SRR12129269 | PRIN4683617          |
| CORE0187.V3.norCOVID.OP.PS   | SRR12129257 | PRIN4683617          |
| CORE0188.V1.norCOVID.NP.PS   | SRR12129190 | PRIN4683617          |
| CORE0188.V1.norCOVID.OP.PS   | SRR12129179 | PRIN4683617          |
| CORE0188.V2.norCOVID.NP.PS   | SRR12129110 | PRIN4683617          |
| CORE0188.V2.norCOVID.OP.PS   | SRR12129799 | PRIN4683617          |
| CORE0188.V3.norCOVID.NP.PS   | SRR12129788 | PRIN4683617          |
| CORE0188.V3.norCOVID.OP.PS   | SRR12129684 | PRIN4683617          |
| CORE0188.V4.norCOVID.NP.PS   | SRR12129673 | PRIN4683617          |
| CORE0188.V4.norCOVID.OP.PS   | SRR12129606 | PRIN4683617          |
| CORE0189.V1.norCOVID.NP.PS   | SRR12129595 | PRIN4683617          |
| CORE0189.V1.norCOVID.OP.PS   | SRR12129583 | PRIN4683617          |
| CORE0189.V2.norCOVID.NP.PS   | SRR12129516 | PRIN4683617          |
| CORE0189.V2.norCOVID.OP.PS   | SRR12129505 | PRIN4683617          |
| CORE0189.V3.norCOVID.ETA.PRO | SRR12129438 | PRIN4683617          |
| CORE0189.V3.norCOVID.NP.PS   | SRR12129427 | PRIN4683617          |
| CORE0189.V3.norCOVID.OP.PS   | SRR12129417 | PRIN4683617          |
| CORE0189.V4.norCOVID.ETA.PRO | SRR12129350 | PRIN4683617          |
| CORE0189.V4.norCOVID.NP.PS   | SRR12129339 | PRIN4683617          |
| CORE0189.V4.norCOVID.OP.PS   | SRR12129328 | PRIN4683617          |
| CORE0190.V1.norCOVID.NP.PS   | SRR12129243 | PRIN4683617          |
| CORE0190.V1.norCOVID.OP.PS   | SRR12129231 | PRIN4683617          |
| CORE0190.V2.norCOVID.NP.PS   | SRR12129164 | PRIN4683617          |
| CORE0190.V2.norCOVID.OP.PS   | SRR12129153 | PRIN4683617          |
| CORE0193.V5.COVID.NP.PRO     | SRR12129142 | PRIN4683617          |
| CORE0193.V5.COVID.OP.PRO     | SRR12129177 | PRIN4683617          |
| CORE0196.V2.COVID.ETA.PRO    | SRR12129766 | PRIN4683617          |
| CORE0196.V3.COVID.NP.PRO     | SRR12129755 | PRIN4683617          |
| CORE0196.V3.COVID.OP.PRO     | SRR12129744 | PRIN4683617          |
| CORE0196.V3.COVID.OP.PRO     | SRR12129733 | PRIN4683617          |
| CORE0196.V4.COVID.NP.PRO     | SRR12129722 | PRIN4683617          |
| CORE0196.V4.COVID.OP.PRO     | SRR12129567 | PRIN4683617          |
| CORE0196.V5.COVID.ETA.PRO    | SRR12129563 | PRIN4683617          |
| CORE0196.V5.COVID.NP.PRO     | SRR12129562 | PRIN4683617          |
| CORE0196.V5.COVID.OP.PRO     | SRR12129561 | PRIN4683617          |
| CORE0196.V6.COVID.NP.PRO     | SRR12129560 | PRIN4683617          |
| CORE0196.V6.COVID.OP.PRO     | SRR12129559 | PRIN4683617          |
| CORE0196.V7.COVID.NP.PRO     | SRR12129558 | PRIN4683617          |
| CORE0196.V7.COVID.OP.PRO     | SRR12129557 | PRIN4683617          |
| CORE0197.V2.COVID.ETA.PRO    | SRR12129556 | PRIN4683617          |
| CORE0197.V3.COVID.NP.PRO     | SRR12129555 | PRIN4683617          |
| CORE0197.V3.COVID.OP.PRO     | SRR12129553 | PRIN4683617          |
| CORE0197.V4.COVID.NP.PRO     | SRR12129552 | PRIN4683617          |
| CORE0197.V4.COVID.OP.PRO     | SRR12129551 | PRIN4683617          |
| CORE0197.V5.COVID.NP.PRO     | SRR12129527 | PRIN4683617          |
| CORE0197.V5.COVID.OP.PRO     | SRR12129526 | PRIN4683617          |
| CORE0197.V6.COVID.ETA.PRO    | SRR12129525 | PRIN4683617          |
| CORE0197.V6.COVID.NP.PRO     | SRR12129524 | PRIN4683617          |
| CORE0197.V6.COVID.OP.PRO     | SRR12129523 | PRIN4683617          |
| CORE0200.V1.COVID.NP.PRO     | SRR12129522 | PRIN4683617          |
| CORE0200.V1.COVID.OP.PRO     | SRR12129521 | PRIN4683617          |
| CORE0201.V1.COVID.NP.PRO     | SRR12129519 | PRIN4683617          |
| CORE0201.V1.COVID.OP.PRO     | SRR12129518 | PRIN4683617          |
| CORE0202.V1.COVID.NP.PRO     | SRR12129517 | PRIN4683617          |
| CORE0202.V1.COVID.OP.PRO     | SRR12129516 | PRIN4683617          |
| CORE0203.V1.COVID.ETA.PRO    | SRR12129515 | PRIN4683617          |
| CORE0203.V1.COVID.NP.PRO     | SRR12129514 | PRIN4683617          |
| CORE0203.V1.COVID.OP.PRO     | SRR12129513 | PRIN4683617          |
| CORE0203.V2.COVID.ETA.PRO    | SRR12129512 | PRIN4683617          |
| CORE0203.V2.COVID.NP.PRO     | SRR12129511 | PRIN4683617          |
| CORE0203.V2.COVID.OP.PRO     | SRR12129509 | PRIN4683617          |
| CORE0203.V3.COVID.ETA.PRO    | SRR12129502 | PRIN4683617          |
| CORE0203.V3.COVID.NP.PRO     | SRR12129501 | PRIN4683617          |
| CORE0203.V3.COVID.OP.PRO     | SRR12129660 | PRIN4683617          |
| CORE0203.V4.COVID.ETA.PRO    | SRR12129659 | PRIN4683617          |
| CORE0203.V4.COVID.NP.PRO     | SRR12129658 | PRIN4683617          |
| CORE0203.V4.COVID.OP.PRO     | SRR12129657 | PRIN4683617          |
| CORE0203.V5.COVID.NP.PRO     | SRR12129656 | PRIN4683617          |
| CORE0203.V5.COVID.OP.PRO     | SRR12129655 | PRIN4683617          |
| CORE0204.V1.COVID.NP.PRO     | SRR12129654 | PRIN4683617          |
| CORE0204.V1.COVID.OP.PRO     | SRR12129653 | PRIN4683617          |
| CORE0204.V2.COVID.ETA.PRO    | SRR12129651 | PRIN4683617          |
| CORE0204.V2.COVID.NP.PRO     | SRR12129650 | PRIN4683617          |
| CORE0204.V2.COVID.OP.PRO     | SRR12129649 | PRIN4683617          |
| CORE0204.V3.COVID.ETA.PRO    | SRR12129648 | PRIN4683617          |
| CORE0204.V3.COVID.NP.PRO     | SRR12129647 | PRIN4683617          |
| CORE0204.V3.COVID.OP.PRO     | SRR12129646 | PRIN4683617          |
| CORE0204.V4.COVID.NP.PRO     | SRR12129645 | PRIN4683617          |
| CORE0204.V4.COVID.OP.PRO     | SRR12129644 | PRIN4683617          |
| CORE0204.V5.COVID.NP.PRO     | SRR12129643 | PRIN4683617          |
| CORE0204.V5.COVID.OP.PRO     | SRR12129642 | PRIN4683617          |
| CORE0205.V1.COVID.NP.PRO     | SRR12129640 | PRIN4683617          |
| CORE0205.V1.COVID.OP.PRO     | SRR12129639 | PRIN4683617          |
| CORE0205.V2.COVID.NP.PRO     | SRR12129638 | PRIN4683617          |
| CORE0205.V2.COVID.OP.PRO     | SRR12129637 | PRIN4683617          |
| CORE0205.V3.COVID.NP.PRO     | SRR12129636 | PRIN4683617          |
| CORE0205.V3.COVID.OP.PRO     | SRR12129635 | PRIN4683617          |
| CORE0206.V1.COVID.ETA.PRO    | SRR12129634 | PRIN4683617          |
| CORE0206.V1.COVID.NP.PRO     | SRR12129633 | PRIN4683617          |
| CORE0206.V1.COVID.OP.PRO     | SRR12129632 | PRIN4683617          |
| CORE0206.V2.COVID.NP.PRO     | SRR12129631 | PRIN4683617          |
| CORE0206.V2.COVID.OP.PRO     | SRR12129630 | PRIN4683617          |
| CORE0206.V3.COVID.ETA.PRO    | SRR12129629 | PRIN4683617          |
| CORE0206.V3.COVID.NP.PRO     | SRR12129628 | PRIN4683617          |
| CORE0206.V3.COVID.OP.PRO     | SRR12129627 | PRIN4683617          |
| CORE0207.V1.COVID.NP.PRO     | SRR12129626 | PRIN4683617          |
| CORE0207.V1.COVID.OP.PRO     | SRR12129625 | PRIN4683617          |
| CORE0207.V2.COVID.NP.PRO     | SRR12129624 | PRIN4683617          |
| CORE0207.V2.COVID.OP.PRO     | SRR12129623 | PRIN4683617          |
| CORE0207.V3.COVID.NP.PRO     | SRR12129622 | PRIN4683617          |
| CORE0207.V3.COVID.OP.PRO     | SRR12129621 | PRIN4683617          |
| CORE0207.V4.COVID.NP.PRO     | SRR12129620 | PRIN4683617          |
| CORE0207.V4.COVID.OP.PRO     | SRR12129619 | PRIN4683617          |
| CORE0208.V1.COVID.NP.PRO     | SRR12129618 | PRIN4683617          |
| CORE0208.V1.COVID.OP.PRO     | SRR12129617 | PRIN4683617          |
| CORE0208.V2.COVID.NP.PRO     | SRR12129616 | PRIN4683617          |
| CORE0208.V2.COVID.OP.PRO     | SRR12129615 | PRIN4683617          |
| CORE0209.V1.COVID.NP.PRO     | SRR12129614 | PRIN4683617          |
| CORE0209.V1.COVID.OP.PRO     | SRR12129613 | PRIN4683617          |
| CORE0209.V2.COVID.ETA.PRO    | SRR12129612 | PRIN4683617          |
| CORE0209.V2.COVID.NP.PRO     | SRR12129611 | PRIN4683617          |
| CORE0209.V2.COVID.OP.PRO     | SRR12129610 | PRIN4683617          |
| CORE0209.V3.COVID.NP.PRO     | SRR12129609 | PRIN4683617          |
| CORE0209.V3.COVID.OP.PRO     | SRR12129608 | PRIN4683617          |
| CORE0210.V1.COVID.ETA.PRO    | SRR12129607 | PRIN4683617          |
| CORE0210.V1.COVID.NP.PRO     | SRR12129606 | PRIN4683617          |
| CORE0210.V1.COVID.OP.PRO     | SRR12129605 | PRIN4683617          |
| CORE0210.V2.COVID.NP.PRO     | SRR12129604 | PRIN4683617          |
| CORE0210.V2.COVID.OP.PRO     | SRR12129603 | PRIN4683617          |
| CORE0210.V3.COVID.ETA.PRO    | SRR12129602 | PRIN4683617          |
| CORE0210.V3.COVID.NP.PRO     | SRR12129601 | PRIN4683617          |
| CORE0210.V3.COVID.OP.PRO     | SRR12129600 | PRIN4683617          |
| CORE0210.V4.COVID.NP.PRO     | SRR12129599 | PRIN4683617          |
