# Supplementary material for: Signatures of COVID-19 Severity and Immune Response in the Respiratory Tract Microbiome
Source: mBio. 2021 Aug 17;12(4):e01777-21. doi: 10.1128/mBio.01777-21 (PMC8406335; doi:10.1128/mBio.01777-21)
Supplement: TABLE S4 [file mbio.01777-21-st004.pdf]

**Table E4A. Comparison of microbiome data to patient demographics, treatment, and outcomes.**

**Table S4B. Comparison of microbiome data to clinical laboratory data.**

**Table S4C. Comparison of microbiome data to Lymphocyte-to-Neutrophil ratios.**

**Table S4D. Comparison of microbiome data to immune profiling available on 34 subjects.**

[illegible]
